# Supplementary material for: Influence of Mutations and N-Glycosylation Sites in the Receptor-Binding Domain (RBD) and the Membrane Protein of SARS-CoV-2 Variants of Concern on Antibody Binding in ELISA
Source: MDPI journal article supplement (doi:10.3390/biology13040207), 2024-03-23
Supplement: s1 [file s1]

## *Supplementary Material*

Influence of mutations and N-glycosylation sites in the receptor-binding domain (RBD) and the membrane protein of SARS-CoV-2 variants of concern on antibody recognition by ELISA.

Mandy Schwarze<sup>1,2</sup>, Daniela Volke<sup>1,2</sup>, Juan Camilo Rojas Echeverri<sup>1,2</sup>, Robin Schick<sup>1,2</sup>, Nicole Lakowa<sup>3</sup>, Thomas Grünewald<sup>3</sup>, Johannes Wolf<sup>4,5</sup>, Stephan Borte<sup>4,5</sup>, Markus Scholz<sup>6,7</sup>, Andor Krizsan<sup>1,2</sup>, and Ralf Hoffmann<sup>1,2,\*</sup>

<sup>1</sup> Institute of Bioanalytical Chemistry, Faculty of Chemistry and Mineralogy, Universität Leipzig, 04103 Leipzig, Germany

<sup>2</sup> Center for Biotechnology and Biomedicine, Universität Leipzig, 04103 Leipzig, Germany

<sup>3</sup> Clinic for Infectious Diseases and Tropical Medicine, Klinikum Chemnitz, 09113 Chemnitz, Germany.

<sup>4</sup> Department of Laboratory Medicine, Hospital St. Georg gGmbH, 04129 Leipzig, Germany

<sup>5</sup> ImmunoDeficiencyCenter Leipzig (IDCL), Jeffrey Modell Diagnostic and Research Center for Primary Immunodeficiency Diseases, Hospital St. Georg gGmbH, 04129 Leipzig, Germany.

<sup>6</sup> Institute for Medical Informatics, Statistics and Epidemiology, Universität Leipzig, 04107 Leipzig, Germany

<sup>7</sup> LIFE Research Center of Civilization Diseases, Universität Leipzig, 04103 Leipzig, Germany

\* Corresponding author: bioanaly@rz.uni-leipzig.de

### **Table of Contents**

|                                                                                  |    |
|----------------------------------------------------------------------------------|----|
| Table S1: Clinical parameters of patient serum samples .....                     | 2  |
| Figure S1: Scheme of the FASP method and lectin enrichment for MS analysis ..... | 5  |
| Figure S2: Annotated product ion spectra for all tested RBDs .....               | 6  |
| Figure S3: IgG ELISA of VOC RBDs .....                                           | 20 |
| Figure S4: Normalized IgG ELISA values of different VOC RBDs.....                | 21 |
| Figure S5: Normalized IgG ELISA values of different glycosylated RBDs.....       | 23 |
| Figure S6: Annotated product ion spectrum of TGMADSN[+1]GTITVEELKK .....         | 24 |
| Figure S7: M-protein ELISA and ROC curves.....                                   | 25 |

**Table S1:** Clinical parameters of all patient serum samples included in the current study. The samples are sorted by days after symptom onset, days after PCR, and SARS-CoV-2 positive and negative samples, as previously reported [1]. Samples were used to test the glycosylated VOCs and wt-RBDs in the IgG ELISA, whereas the small sample set was used for the deglycosylation study of RBD- and M-proteins. The order is the same as shown in Figures S2 and S3.

| Name | Origin         | Sex | Age | Days after symptom onset | Days after PCR | IgG VOCs | IgG different glycosylated wt-RBDs | <i>IgG small sample set</i> |
|------|----------------|-----|-----|--------------------------|----------------|----------|------------------------------------|-----------------------------|
| SG4  | St. Georg 2020 | m   | 25  | <b>3</b>                 | --             | x        | x                                  |                             |
| SG16 | St. Georg 2020 | m   | 24  | <b>23</b>                | 51             | x        | x                                  |                             |
| SG13 | St. Georg 2020 | f   | 51  | <b>31</b>                | 31             | x        | x                                  |                             |
| SG37 | St. Georg 2020 | f   | 64  | <b>33</b>                | 0              | x        | x                                  | x                           |
| SG15 | St. Georg 2020 | f   | 65  | <b>33</b>                | 32             | x        | x                                  |                             |
| SG36 | St. Georg 2020 | f   | 40  | <b>34</b>                | 31             | x        | x                                  | x                           |
| SG7  | St. Georg 2020 | f   | 90  | <b>34</b>                | 31             | x        | x                                  | x                           |
| SG31 | St. Georg 2020 | f   | 39  | <b>34</b>                | 32             | x        | x                                  |                             |
| SG29 | St. Georg 2020 | m   | 49  | <b>34</b>                | 32             | x        | x                                  |                             |
| SG34 | St. Georg 2020 | m   | 42  | <b>34</b>                | 29             | x        | x                                  |                             |
| SG22 | St. Georg 2020 | f   | 52  | <b>35</b>                | 29             | x        | x                                  |                             |
| SG9  | St. Georg 2020 | f   | 58  | <b>35</b>                | 0              | x        | x                                  |                             |
| SG32 | St. Georg 2020 | f   | 34  | <b>35</b>                | 0              | x        | x                                  | x                           |
| SG10 | St. Georg 2020 | m   | 55  | <b>36</b>                | 1              | x        | x                                  |                             |
| SG3  | St. Georg 2020 | f   | 64  | <b>37</b>                | 34             | x        | x                                  | x                           |
| SG11 | St. Georg 2020 | m   | 59  | <b>38</b>                | 33             | x        | x                                  |                             |
| SG28 | St. Georg 2020 | m   | 15  | <b>38</b>                | 0              | x        | x                                  |                             |
| SG27 | St. Georg 2020 | f   | 39  | <b>38</b>                | 33             | x        | x                                  |                             |
| SG19 | St. Georg 2020 | f   | 39  | <b>38</b>                | 33             | x        | x                                  |                             |
| SG1  | St. Georg 2020 | m   | 35  | <b>38</b>                | 0              | x        | x                                  | x                           |
| SG6  | St. Georg 2020 | m   | 78  | <b>40</b>                | 44             | x        | x                                  |                             |
| SG33 | St. Georg 2020 | f   | 54  | <b>42</b>                | 36             | x        | x                                  | x                           |
| SG2  | St. Georg 2020 | f   | 54  | <b>43</b>                | 42             | x        | x                                  | x                           |
| SG17 | St. Georg 2020 | m   | 28  | <b>44</b>                | --             | x        | x                                  |                             |
| SG12 | St. Georg 2020 | m   | 54  | <b>44</b>                | 42             | x        | x                                  |                             |
| SG8  | St. Georg 2020 | m   | 47  | <b>44</b>                | 39             | x        | x                                  |                             |
| SG23 | St. Georg 2020 | m   | 63  | <b>45</b>                | 30             | x        | x                                  | x                           |
| SG24 | St. Georg 2020 | m   | 17  | <b>45</b>                | --             | x        | x                                  |                             |
| SG26 | St. Georg 2020 | f   | 54  | <b>47</b>                | 44             | x        | x                                  | x                           |
| SG30 | St. Georg 2020 | m   | 50  | <b>48</b>                | 44             | x        | x                                  |                             |
| SG14 | St. Georg 2020 | m   | 53  | <b>49</b>                | 55             | x        | x                                  |                             |
| SG20 | St. Georg 2020 | m   | 63  | <b>51</b>                | 30             | x        | x                                  |                             |
| SG18 | St. Georg 2020 | f   | 64  | <b>53</b>                | 44             | x        | x                                  |                             |
| SG5  | St. Georg 2020 | f   | 38  | <b>54</b>                | 52             | x        | x                                  |                             |

|       |                |    |    |           |           |   |   |   |
|-------|----------------|----|----|-----------|-----------|---|---|---|
| SG25  | St. Georg 2020 | m  | 52 | <b>55</b> | 33        | x | x |   |
| SG21  | St. Georg 2020 | m  | 42 | <b>55</b> | 46        | x | x | x |
| SG68  | St. Georg 2020 | f  | 80 | --        | <b>0</b>  | x | x |   |
| C13.1 | Chemnitz 2020  | f  | 67 | --        | <b>0</b>  | x | x |   |
| C26   | Chemnitz 2020  | m  | 78 | --        | <b>0</b>  | x | x |   |
| C28   | Chemnitz 2020  | f  | 93 | --        | <b>0</b>  | x | x |   |
| C41   | Chemnitz 2020  | -- | -- | --        | <b>0</b>  | x | x |   |
| C14.1 | Chemnitz 2020  | m  | 68 | --        | <b>1</b>  | x | x |   |
| C32.1 | Chemnitz 2020  | f  | 79 | --        | <b>1</b>  | x | x |   |
| C33   | Chemnitz 2020  | -- | -- | --        | <b>1</b>  | x | x |   |
| C30   | Chemnitz 2020  | m  | 76 | --        | <b>2</b>  | x | x |   |
| C37.1 | Chemnitz 2020  | m  | 37 | --        | <b>2</b>  | x | x | x |
| C35   | Chemnitz 2020  | m  | 80 | --        | <b>3</b>  | x | x |   |
| C40   | Chemnitz 2020  | m  | 75 | --        | <b>4</b>  | x | x |   |
| C27   | Chemnitz 2020  | f  | 88 | --        | <b>5</b>  | x | x |   |
| C31   | Chemnitz 2020  | m  | 82 | --        | <b>5</b>  | x | x |   |
| C23   | Chemnitz 2020  | f  | 62 | --        | <b>6</b>  | x | x |   |
| C13.2 | Chemnitz 2020  | f  | 67 | --        | <b>10</b> | x | x |   |
| C38.2 | Chemnitz 2020  | f  | 75 | --        | <b>15</b> | x | x |   |
| C36   | Chemnitz 2020  | m  | 81 | --        | <b>16</b> | x | x | x |
| C42   | Chemnitz 2020  | -- | -- | --        | <b>19</b> | x | x |   |
| C39   | Chemnitz 2020  | f  | 71 | --        | <b>20</b> | x | x |   |
| C21   | Chemnitz 2020  | f  | 62 | --        | <b>22</b> | x | x |   |
| C18   | Chemnitz 2020  | m  | 67 | --        | <b>25</b> | x | x |   |
| C19   | Chemnitz 2020  | f  | 64 | --        | <b>25</b> | x | x |   |
| C11   | Chemnitz 2020  |    |    | --        | <b>28</b> | x | x |   |
| C43   | Chemnitz 2020  | -- | -- | --        | --        | x | x |   |
| C44   | Chemnitz 2020  | -- | -- | --        | --        | x | x |   |
| C45   | Chemnitz 2020  | -- | -- | --        | --        | x | x |   |
| C46   | Chemnitz 2020  | -- | -- | --        | --        | x | x |   |
| C47   | Chemnitz 2020  | -- | -- | --        | --        | x | x | x |
| C48   | Chemnitz 2020  | -- | -- | --        | --        | x | x | x |
| SG69  | St. Georg 2020 | f  | 45 | --        | --        | x | x |   |
| C49   | Chemnitz 2020  | -- | -- | --        | --        | x | x | x |
| C50   | Chemnitz 2020  | -- | -- | --        | --        | x | x | x |
| C51   | Chemnitz 2020  | -- | -- | --        | --        | x | x |   |
| C52   | Chemnitz 2020  | -- | -- | --        | --        | x | x | x |
| C53   | Chemnitz 2020  | -- | -- | --        | --        | x | x |   |
| C54   | Chemnitz 2020  | -- | -- | --        | --        | x | x | x |
| C55   | Chemnitz 2020  | -- | -- | --        | --        | x | x | x |
| C56   | Chemnitz 2020  | -- | -- | --        | --        | x | x |   |
| C57   | Chemnitz 2020  | -- | -- | --        | --        | x | x |   |
| C58   | Chemnitz 2020  | -- | -- | --        | --        | x | x |   |

|      |                |    |    |    |    |   |   |
|------|----------------|----|----|----|----|---|---|
| C59  | Chemnitz 2020  | -- | -- | -- | -- | x | x |
| SG70 | St. Georg 2020 | f  | 37 | -- | -- | x | x |
| L147 | LIFE 2015      | m  | 72 |    |    | x |   |
| L148 | LIFE 2015      | f  | 77 |    |    | x |   |
| L149 | LIFE 2015      | m  | 74 |    |    | x |   |
| L150 | LIFE 2015      | m  | 48 |    |    | x |   |
| L151 | LIFE 2015      | f  | 28 |    |    | x |   |
| L152 | LIFE 2015      | m  | 75 |    |    | x |   |
| L153 | LIFE 2015      | m  | 47 |    |    | x |   |
| L154 | LIFE 2015      | f  | 45 |    |    | x |   |
| L155 | LIFE 2015      | f  | 60 |    |    | x |   |
| L156 | LIFE 2015      | f  | 46 |    |    | x |   |
| L157 | LIFE 2015      | f  | 66 |    |    |   | x |
| L158 | LIFE 2015      | m  | 47 |    |    |   | x |
| L159 | LIFE 2015      | f  | 43 |    |    |   | x |
| L160 | LIFE 2015      | f  | 72 |    |    |   | x |
| L161 | LIFE 2015      | f  | 45 |    |    |   | x |
| L162 | LIFE 2015      | f  | 70 |    |    |   | x |
| L163 | LIFE 2015      | m  | 39 |    |    |   | x |
| L164 | LIFE 2015      | m  | 32 |    |    |   | x |
| L165 | LIFE 2015      | f  | 50 |    |    |   | x |
| L166 | LIFE 2015      | f  | 46 |    |    |   | x |

1. Schwarze, M.; Luo, J.; Brakel, A.; Krizsan, A.; Lakowa, N.; Grünewald, T.; Lehmann, C.; Wolf, J.; Borte, S.; Milkovska-Stamenova, S.; et al. Evaluation of S- and M-Proteins Expressed in *Escherichia coli* and HEK Cells for Serological Detection of Antibodies in Response to SARS-CoV-2 Infections and mRNA-Based Vaccinations. *Pathogens* **2022**, *11*, doi:10.3390/pathogens11121515

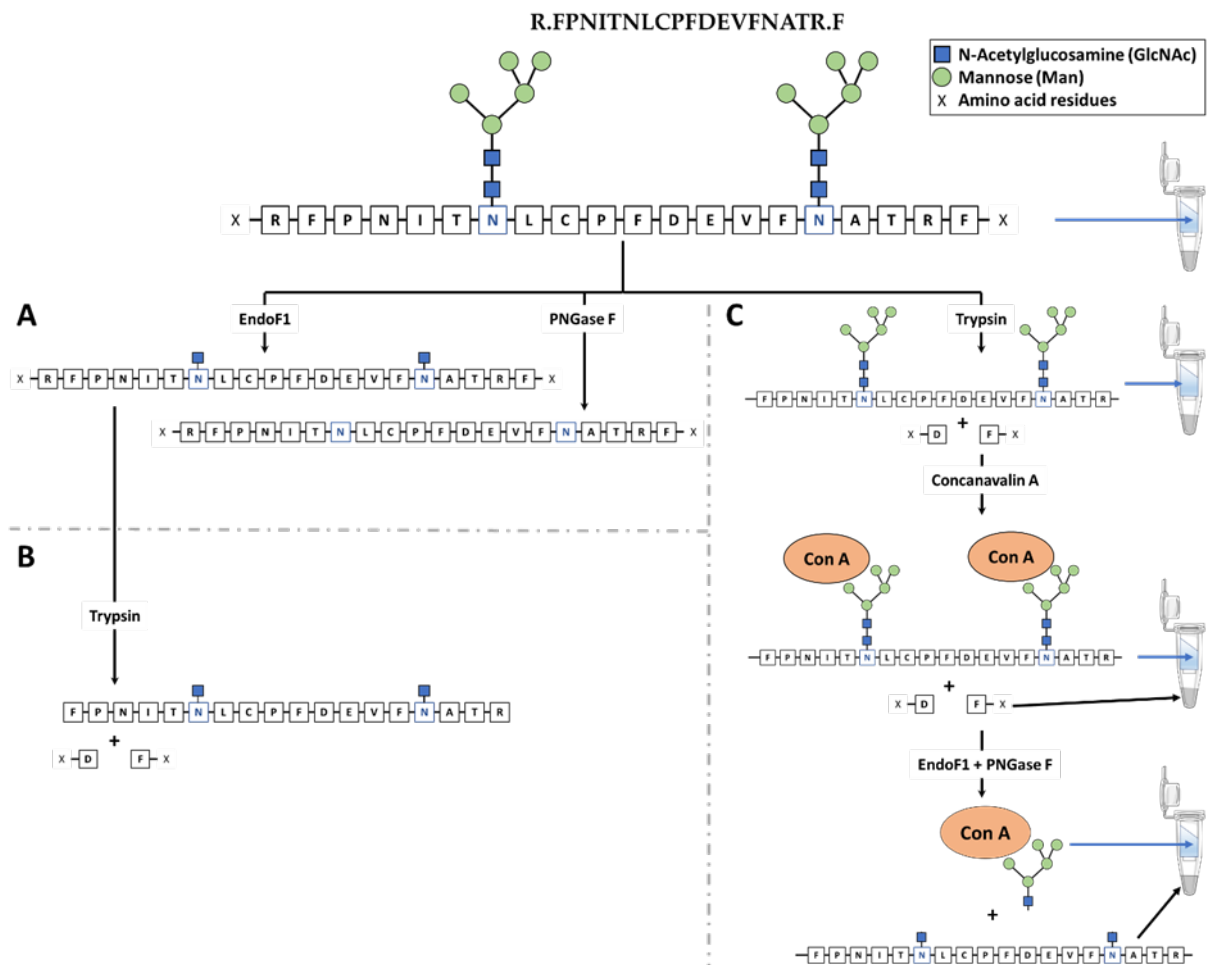

**Figure S1.** Schematic of the protein preparation protocols applied for SDS-PAGE and ELISA (A) and identification of N-glycosylation sites in RBD proteins using the FASP method (B+C). The first protocol was based on Endo F1 and PNGase F treatments at the protein level followed by tryptic digestion (B), while the second protocol started with a tryptic digestion followed by the addition of the lectin concanavalin A and EndoF1/PNGase F treatment (C) for subsequent mass spectrometric analysis.

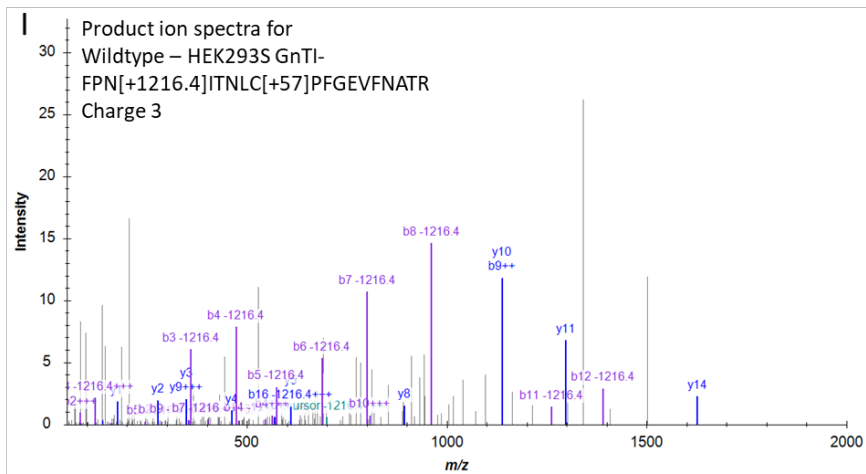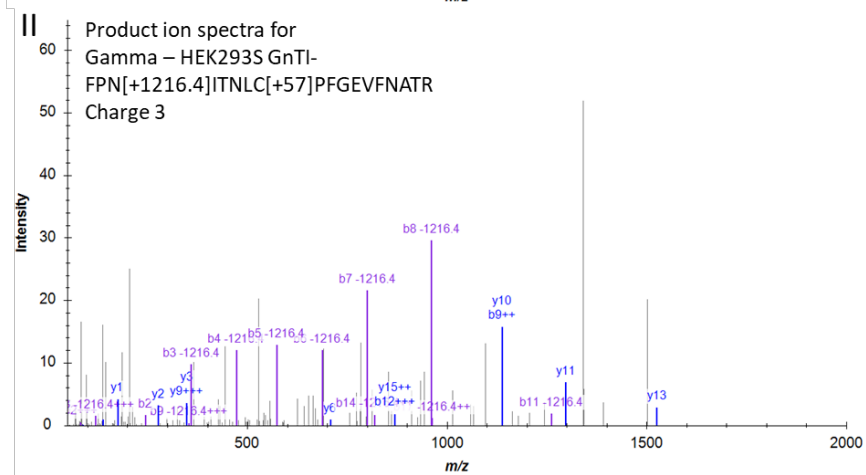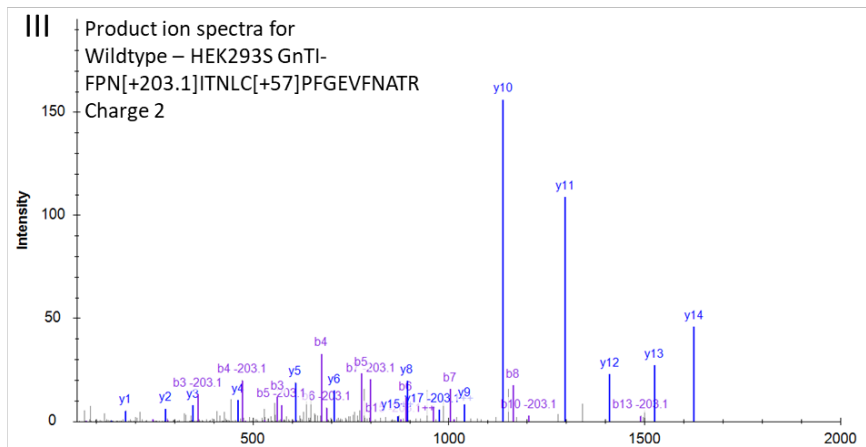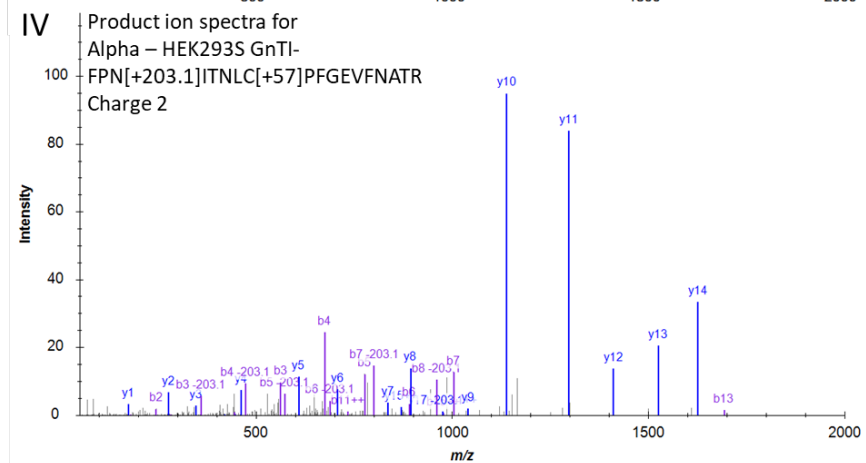

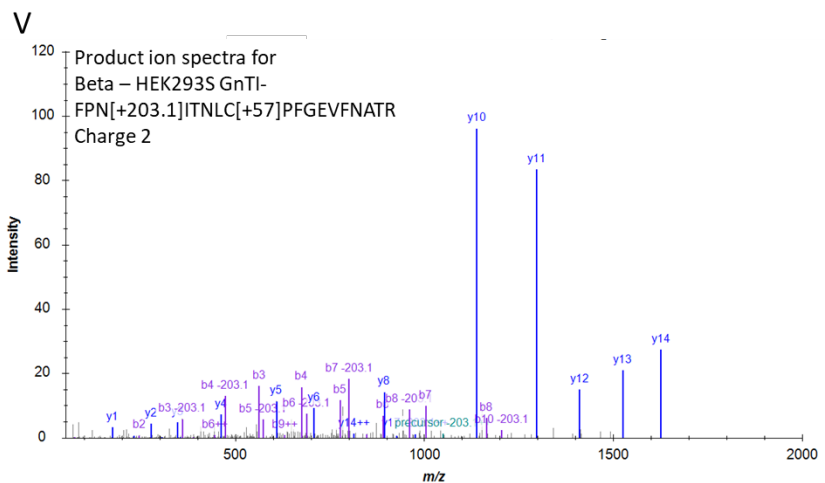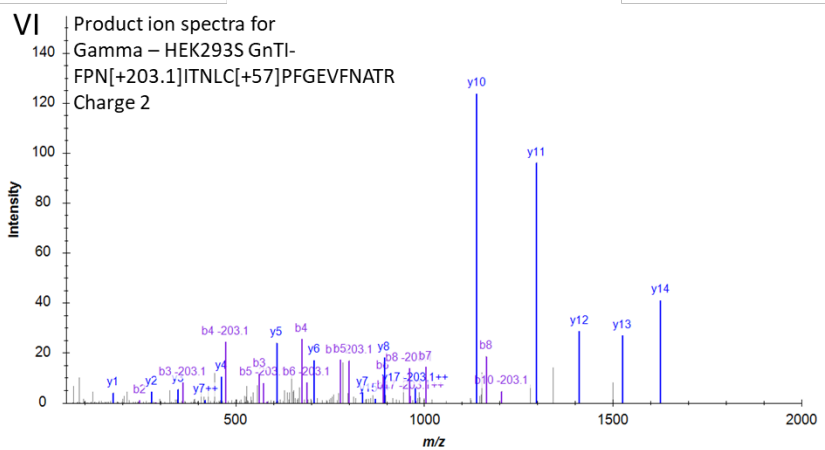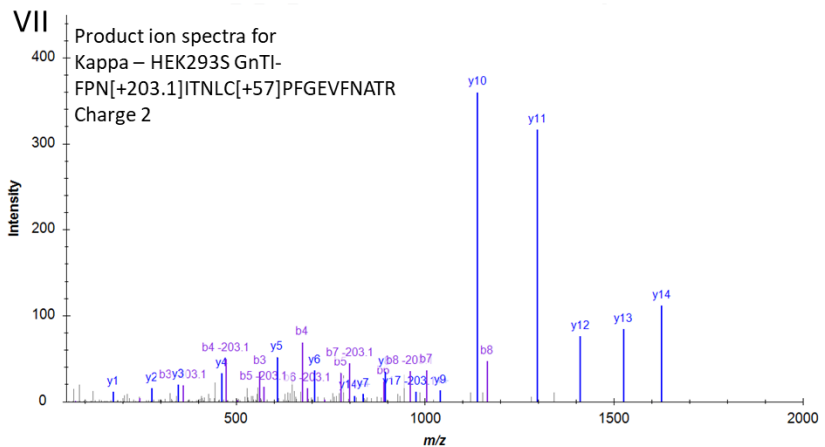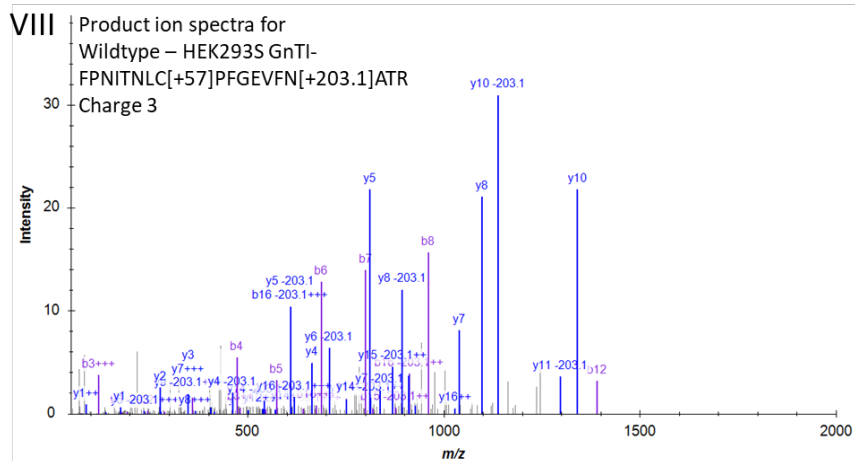

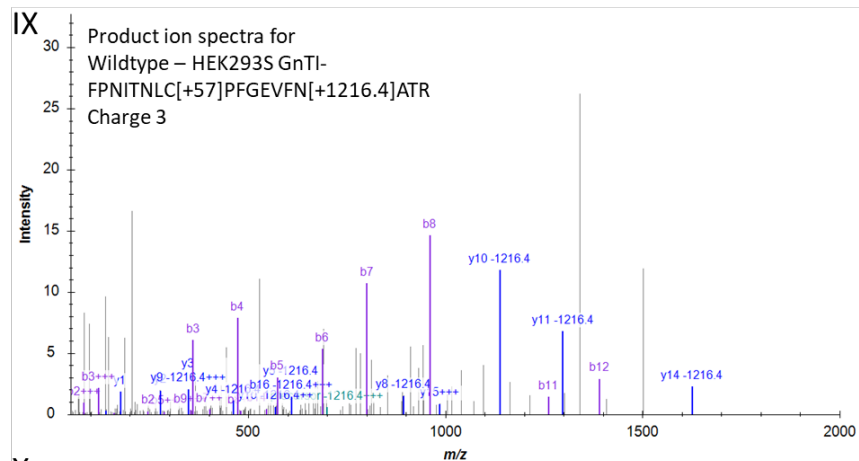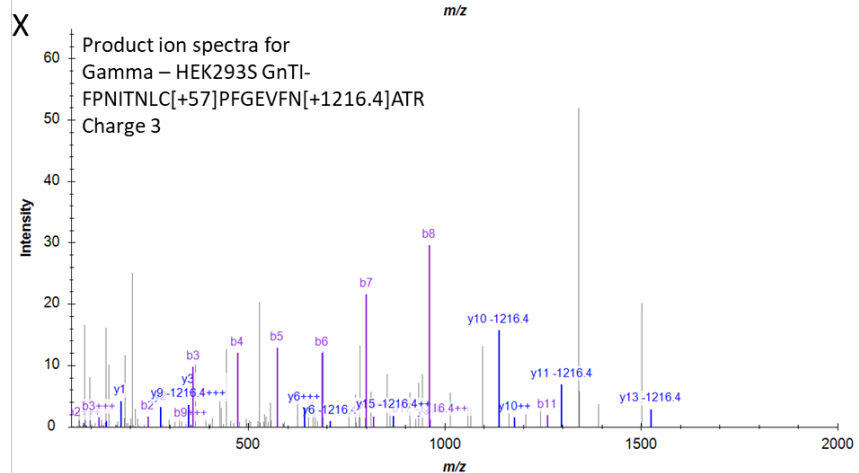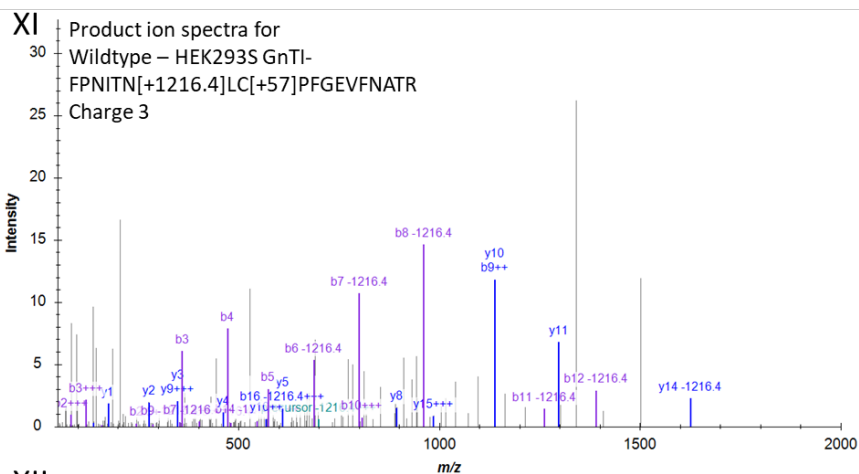



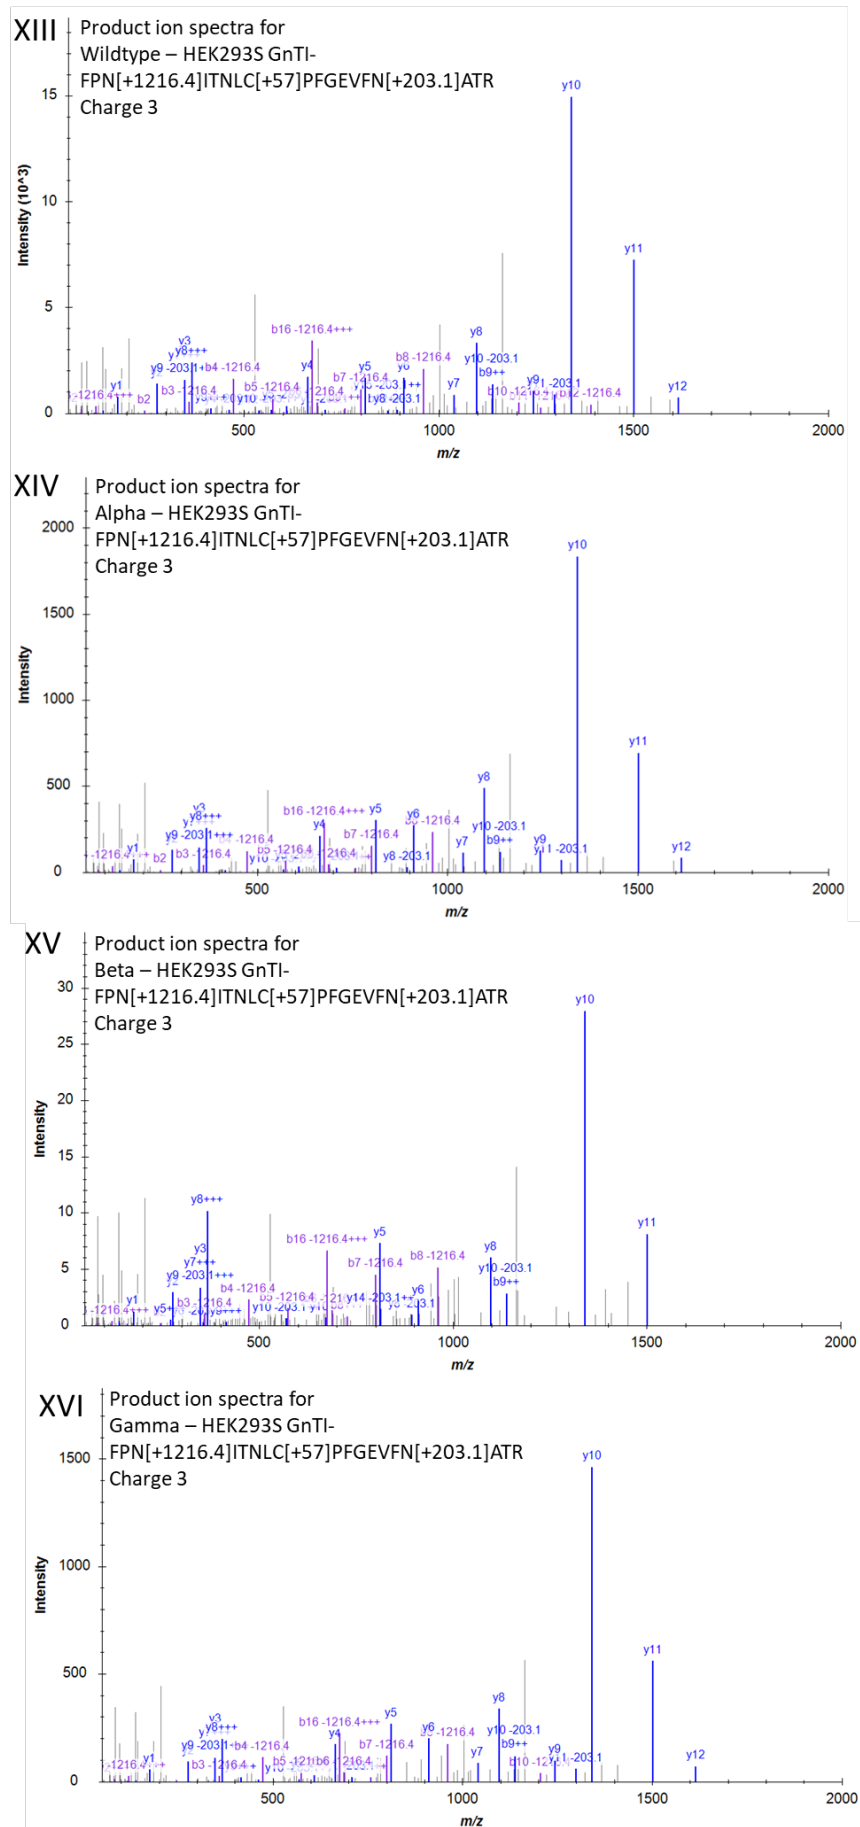

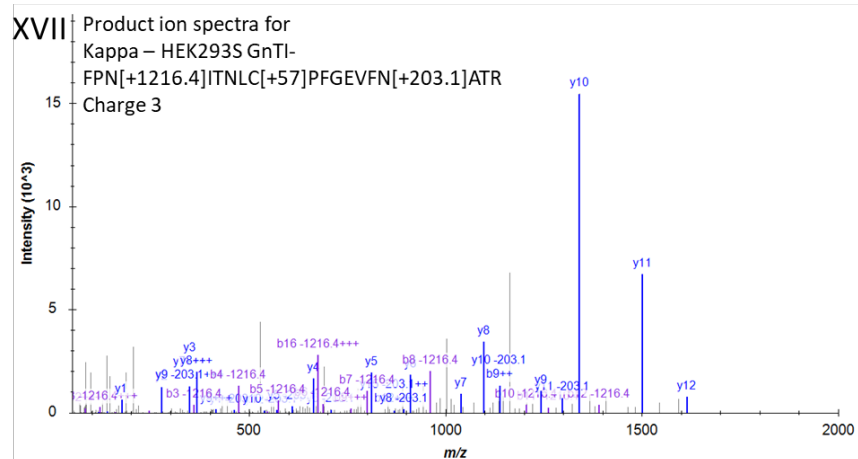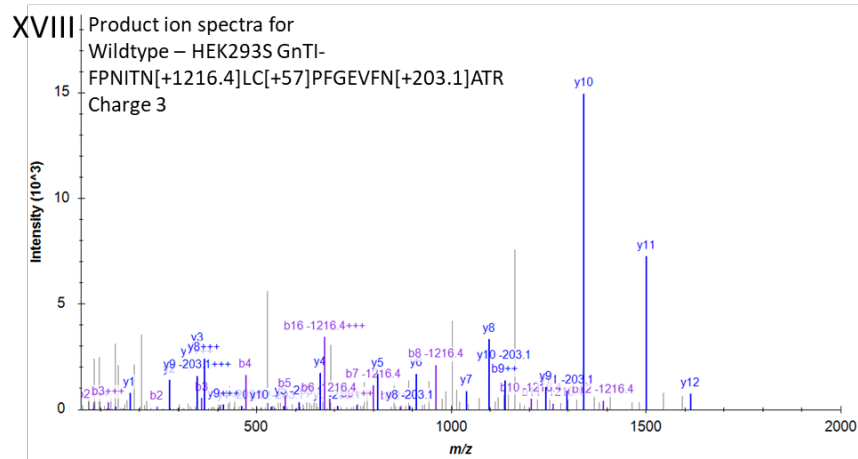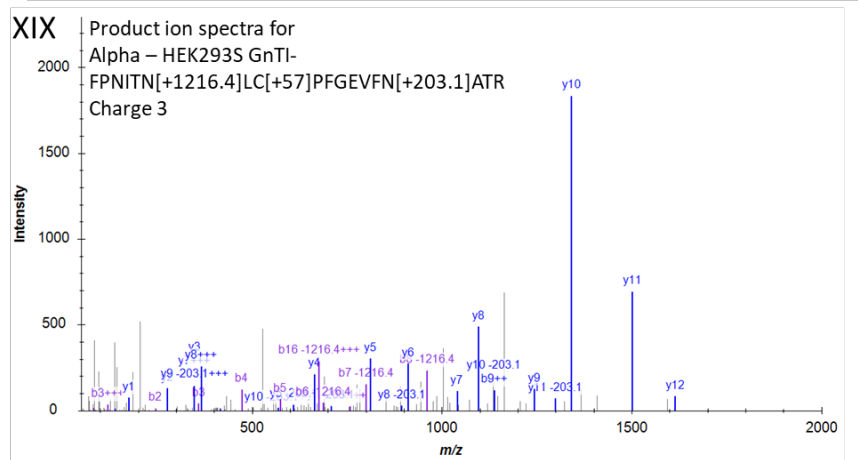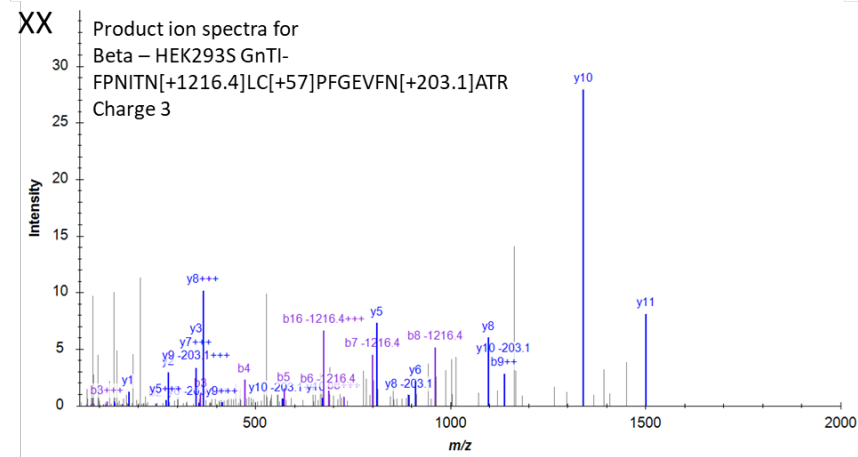

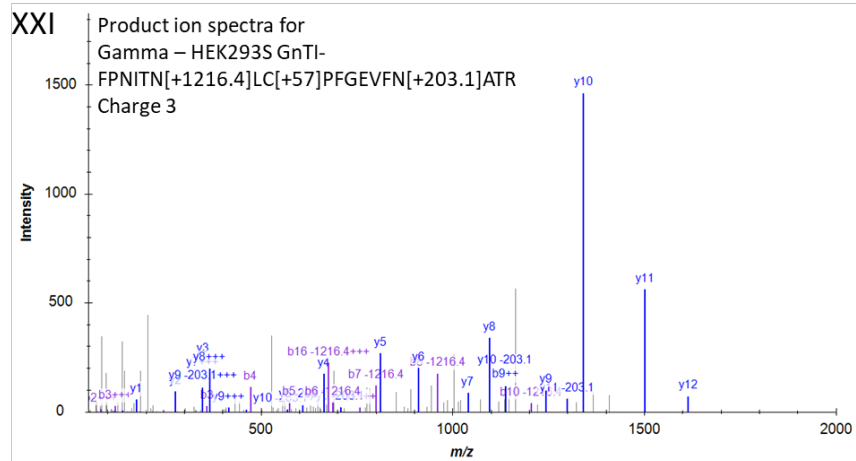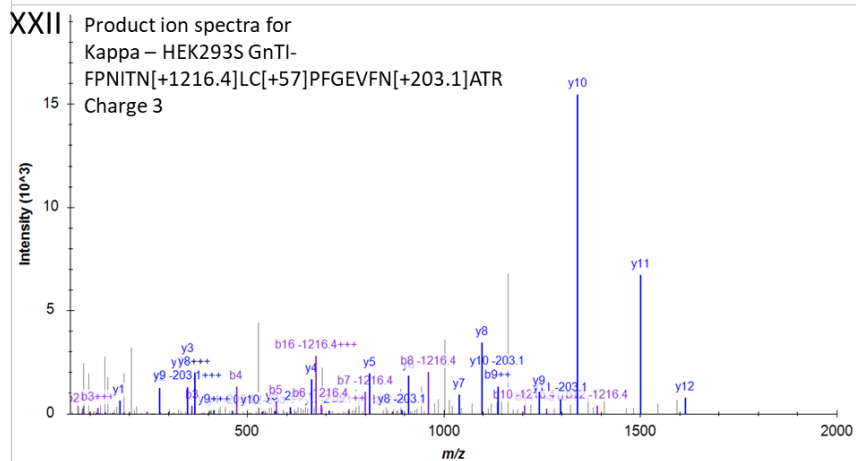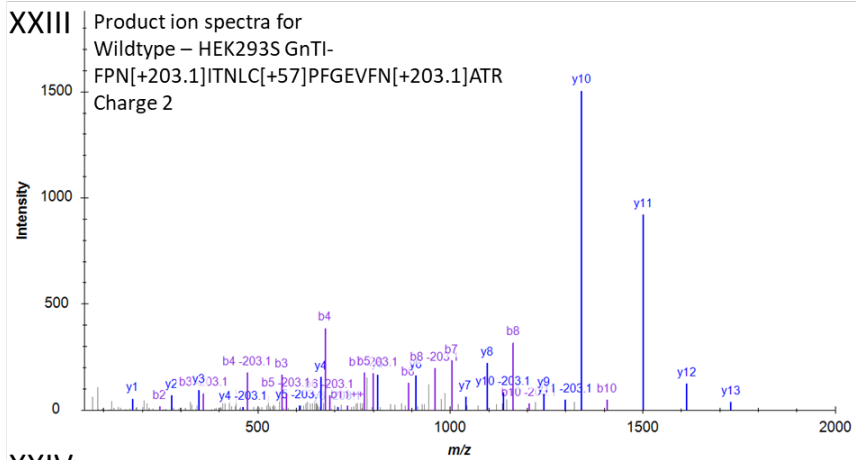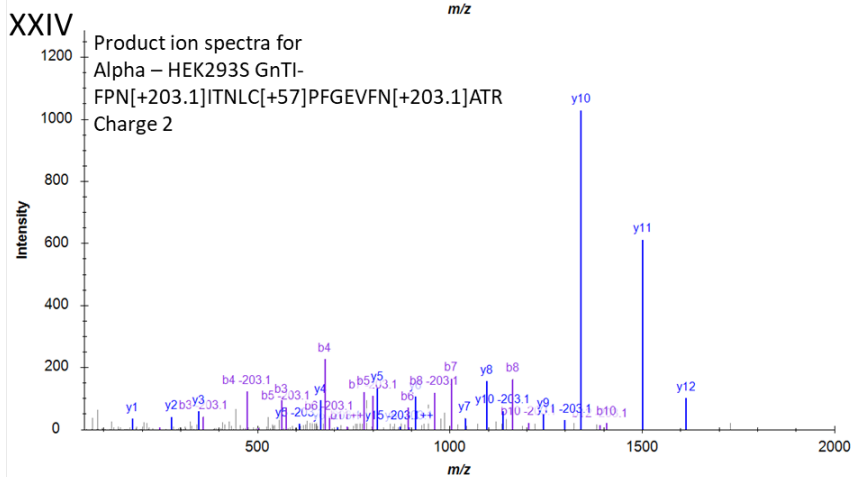

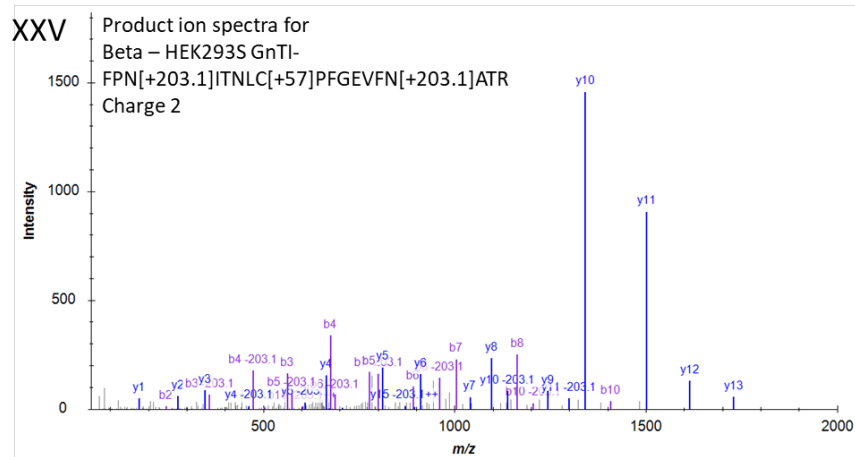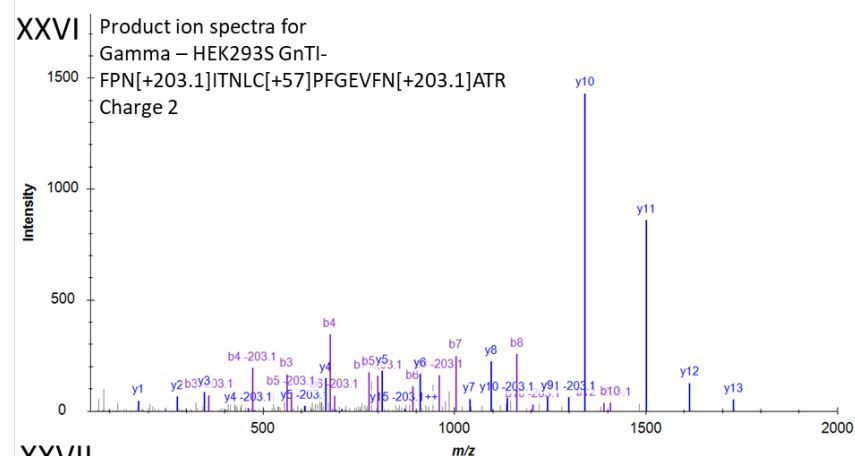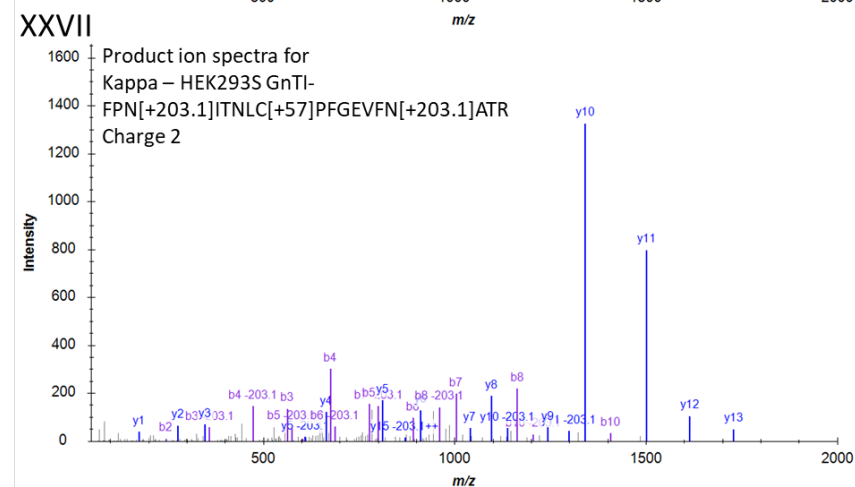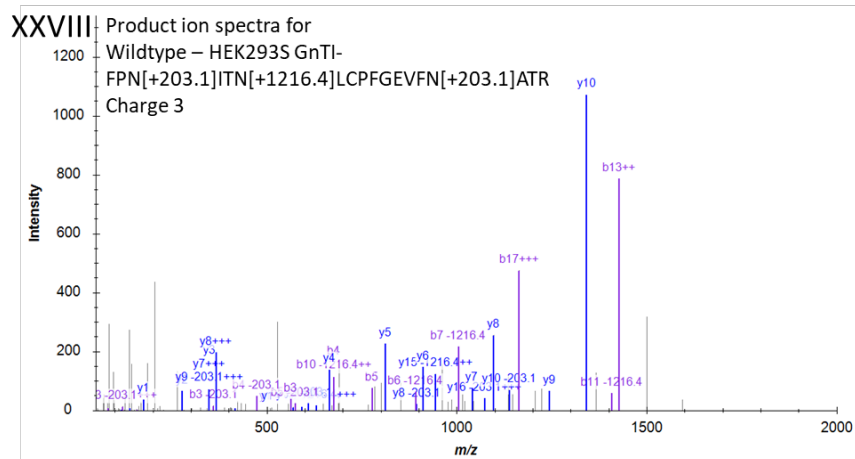

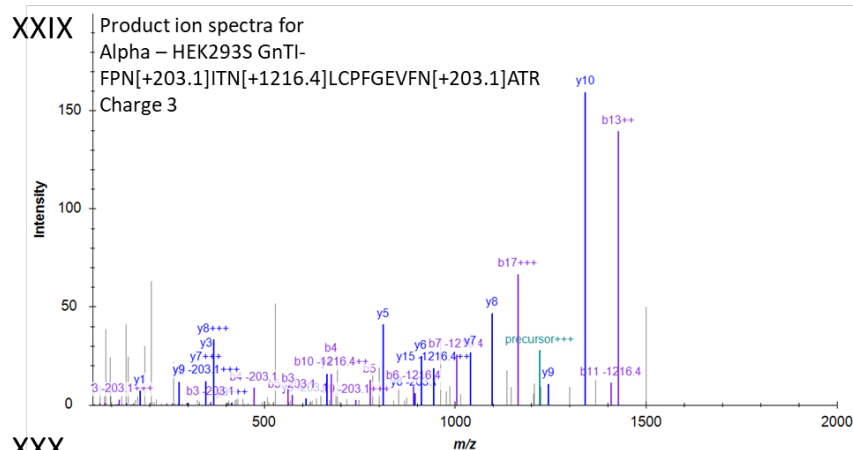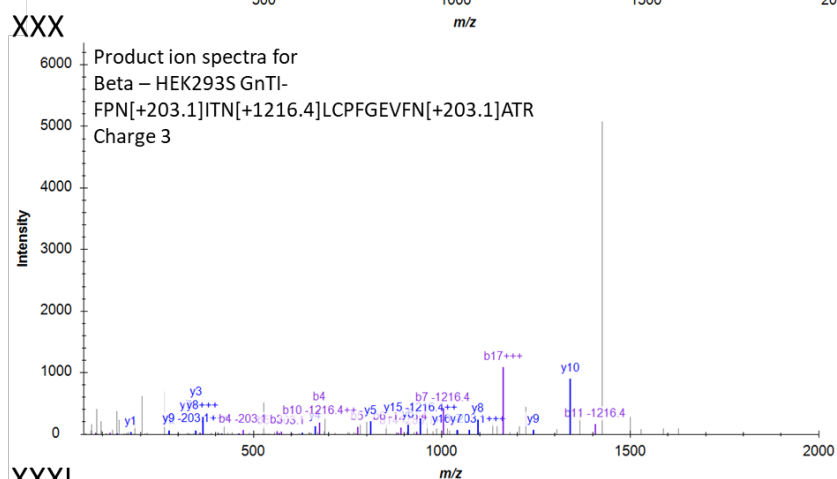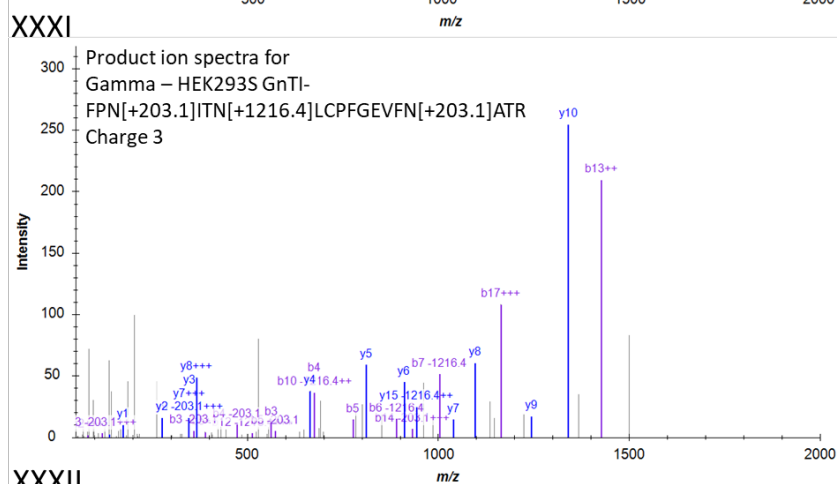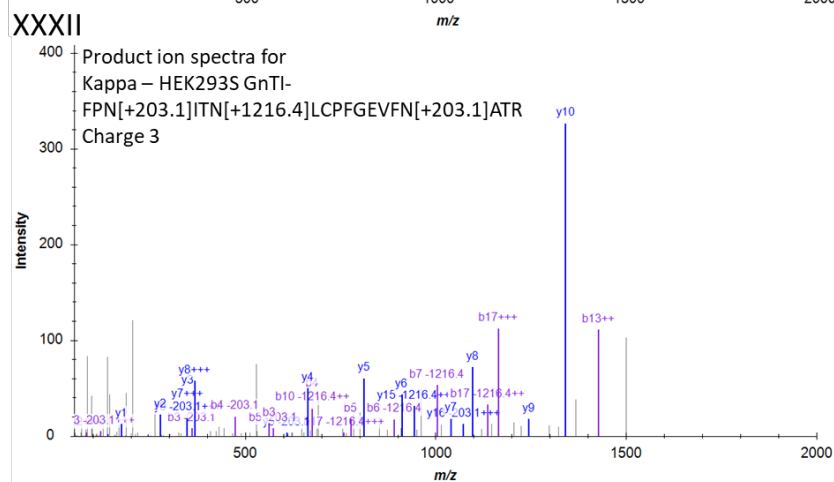

XXXIII

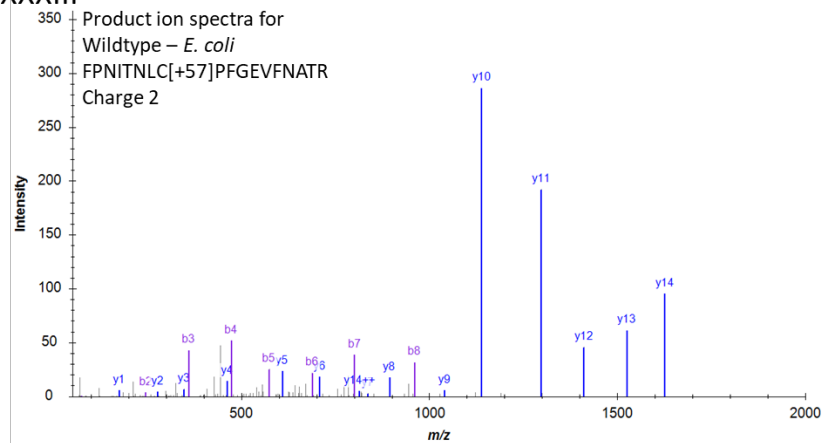

XXXIV

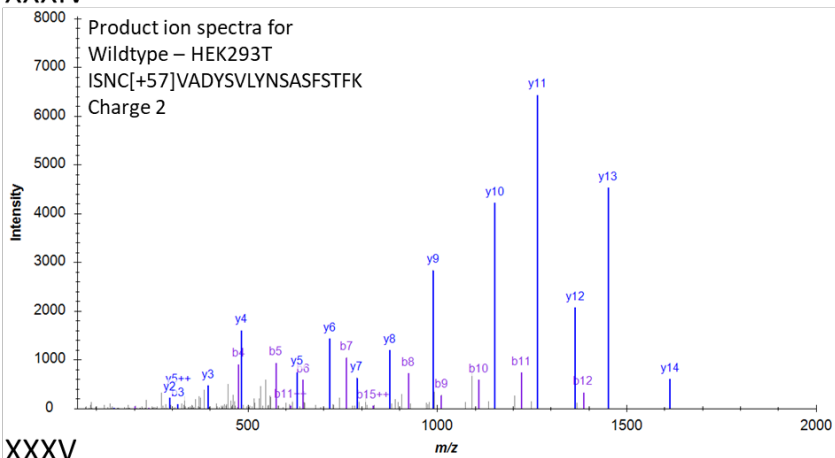

XXXV

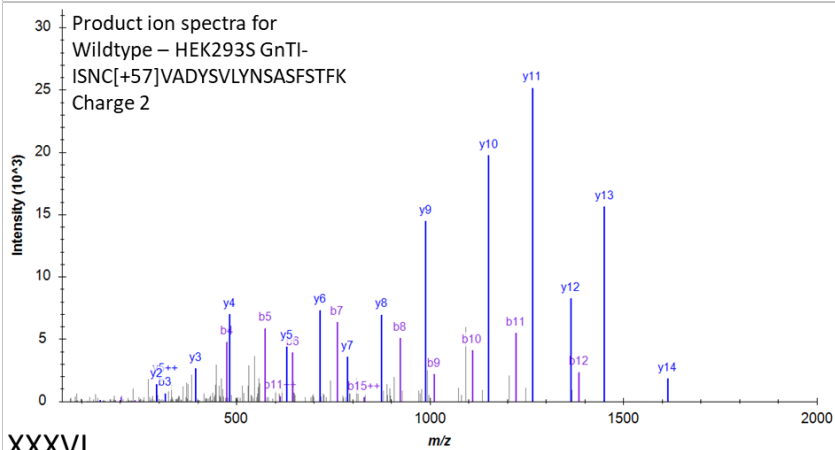

XXXVI

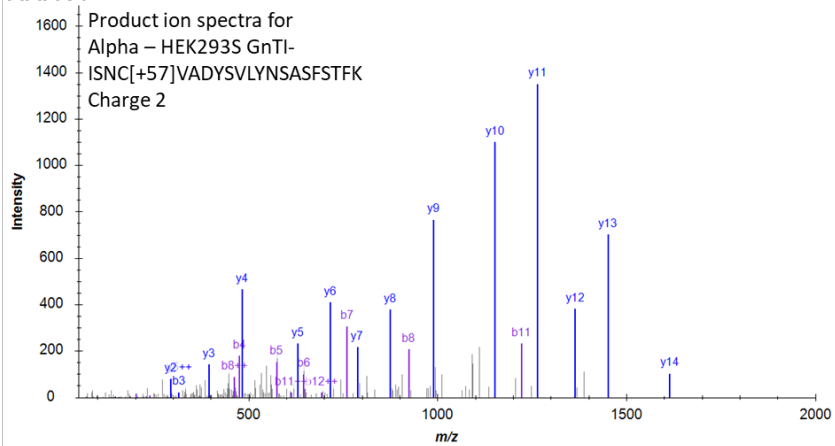

XXXVII

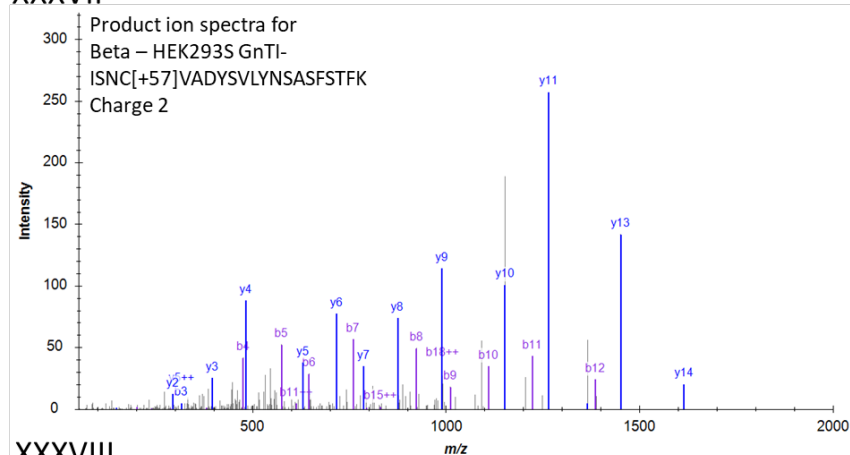

XXXVIII

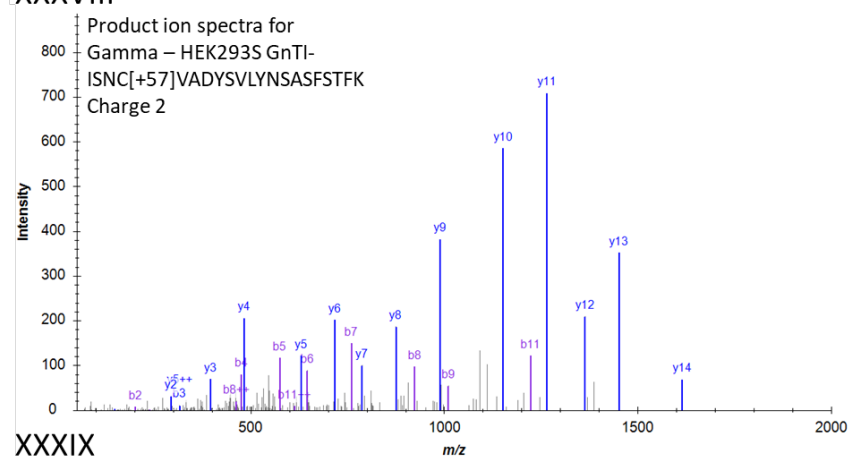

XXXIX

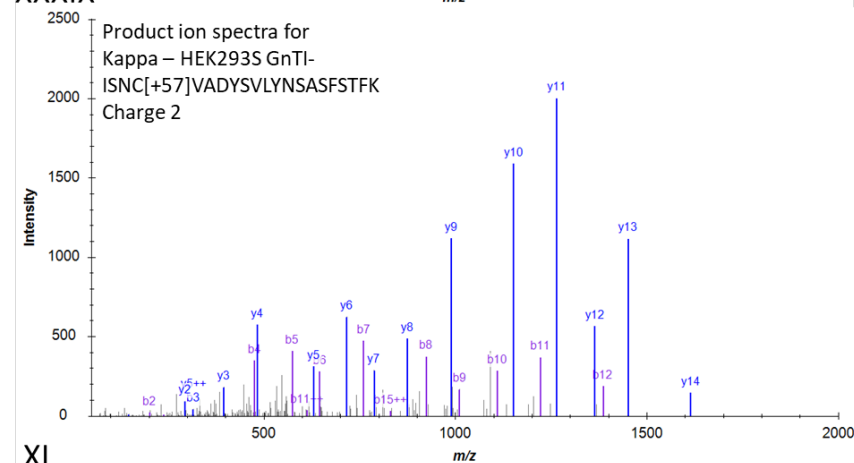

XL

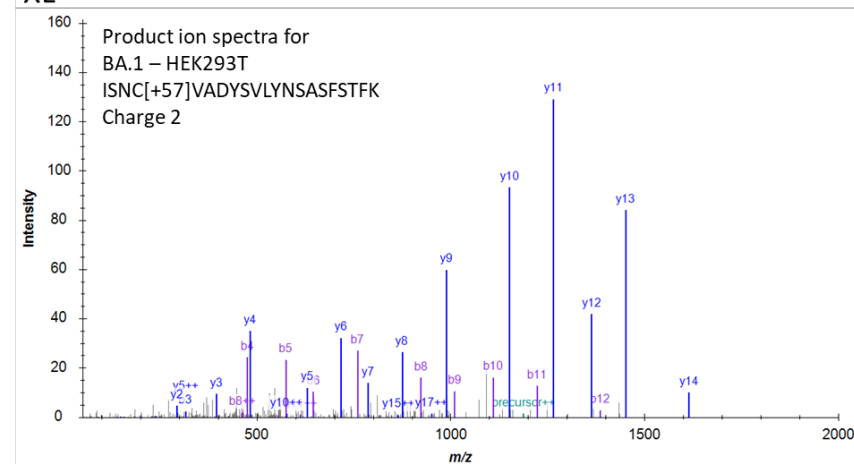

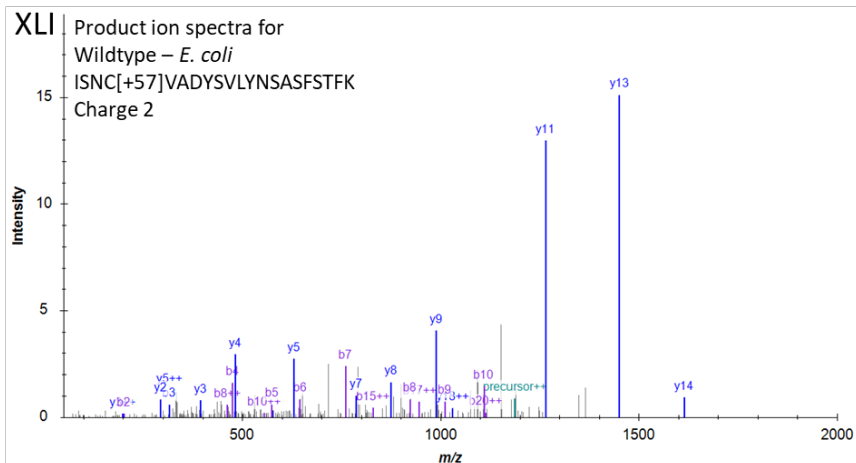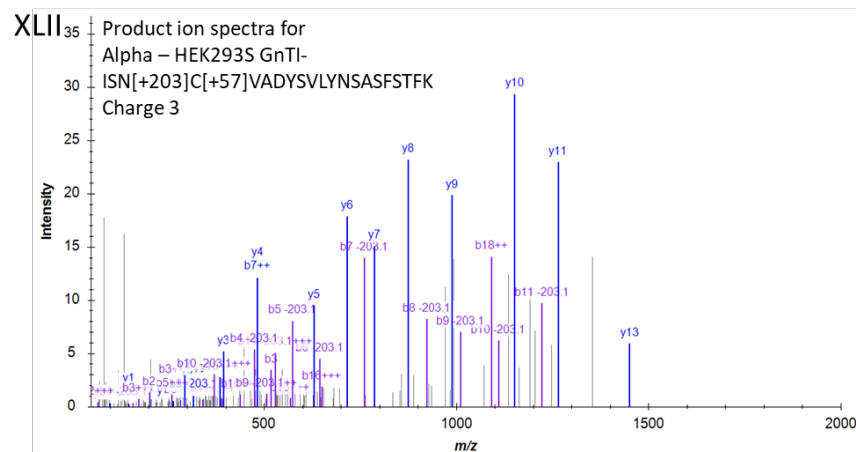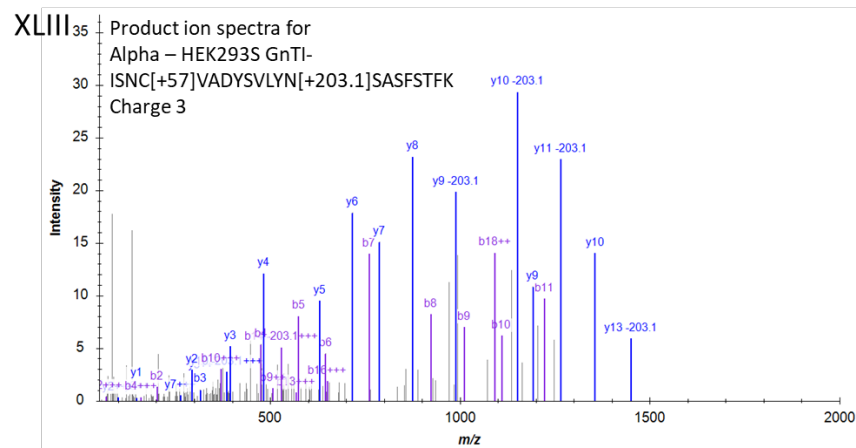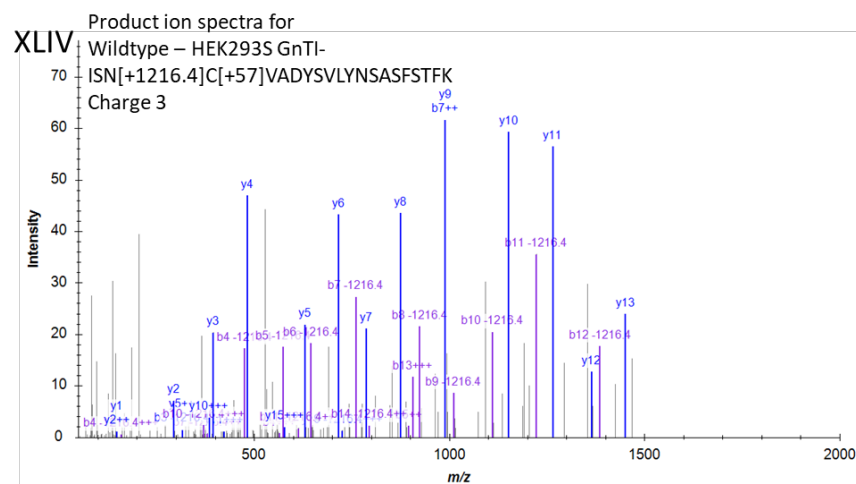



# XLV

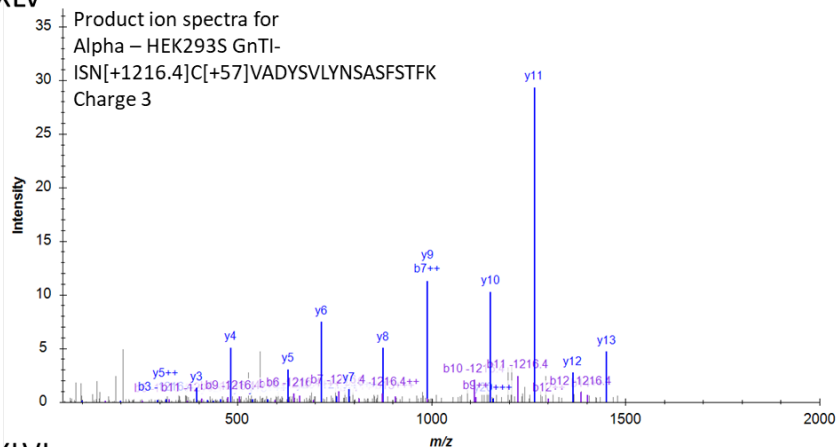

# XLVI

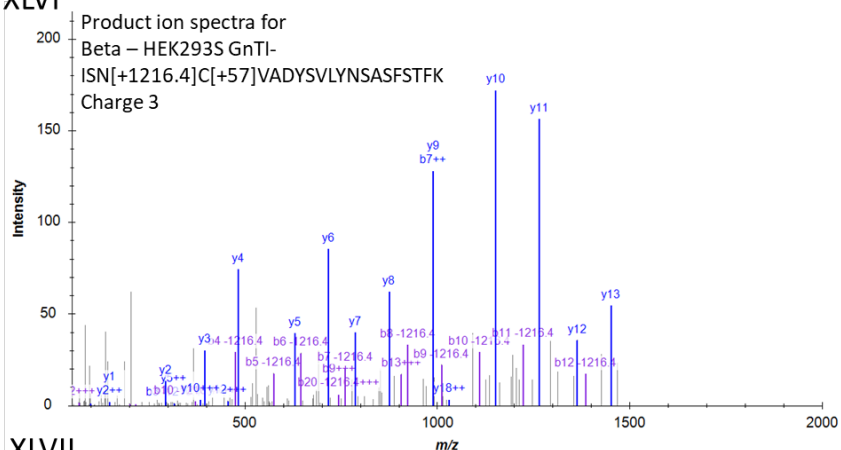

# XLVII

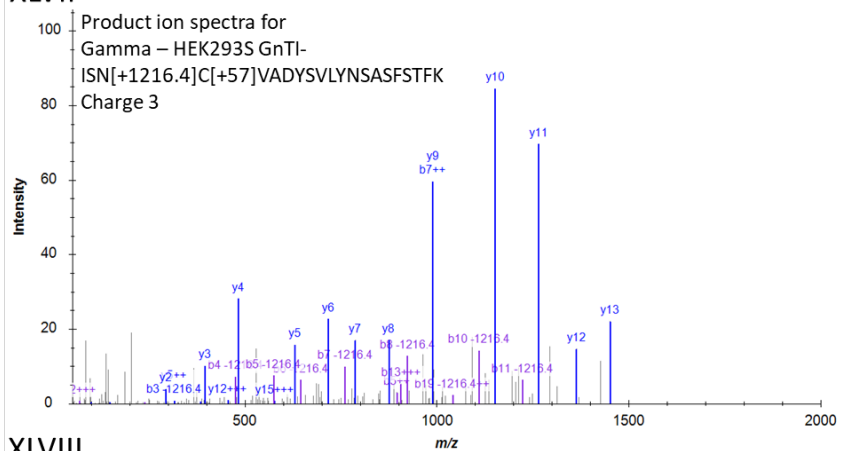

# XLVIII

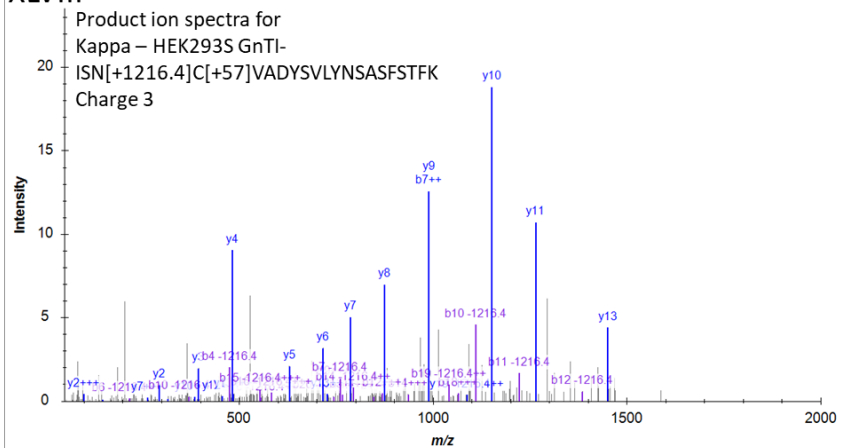

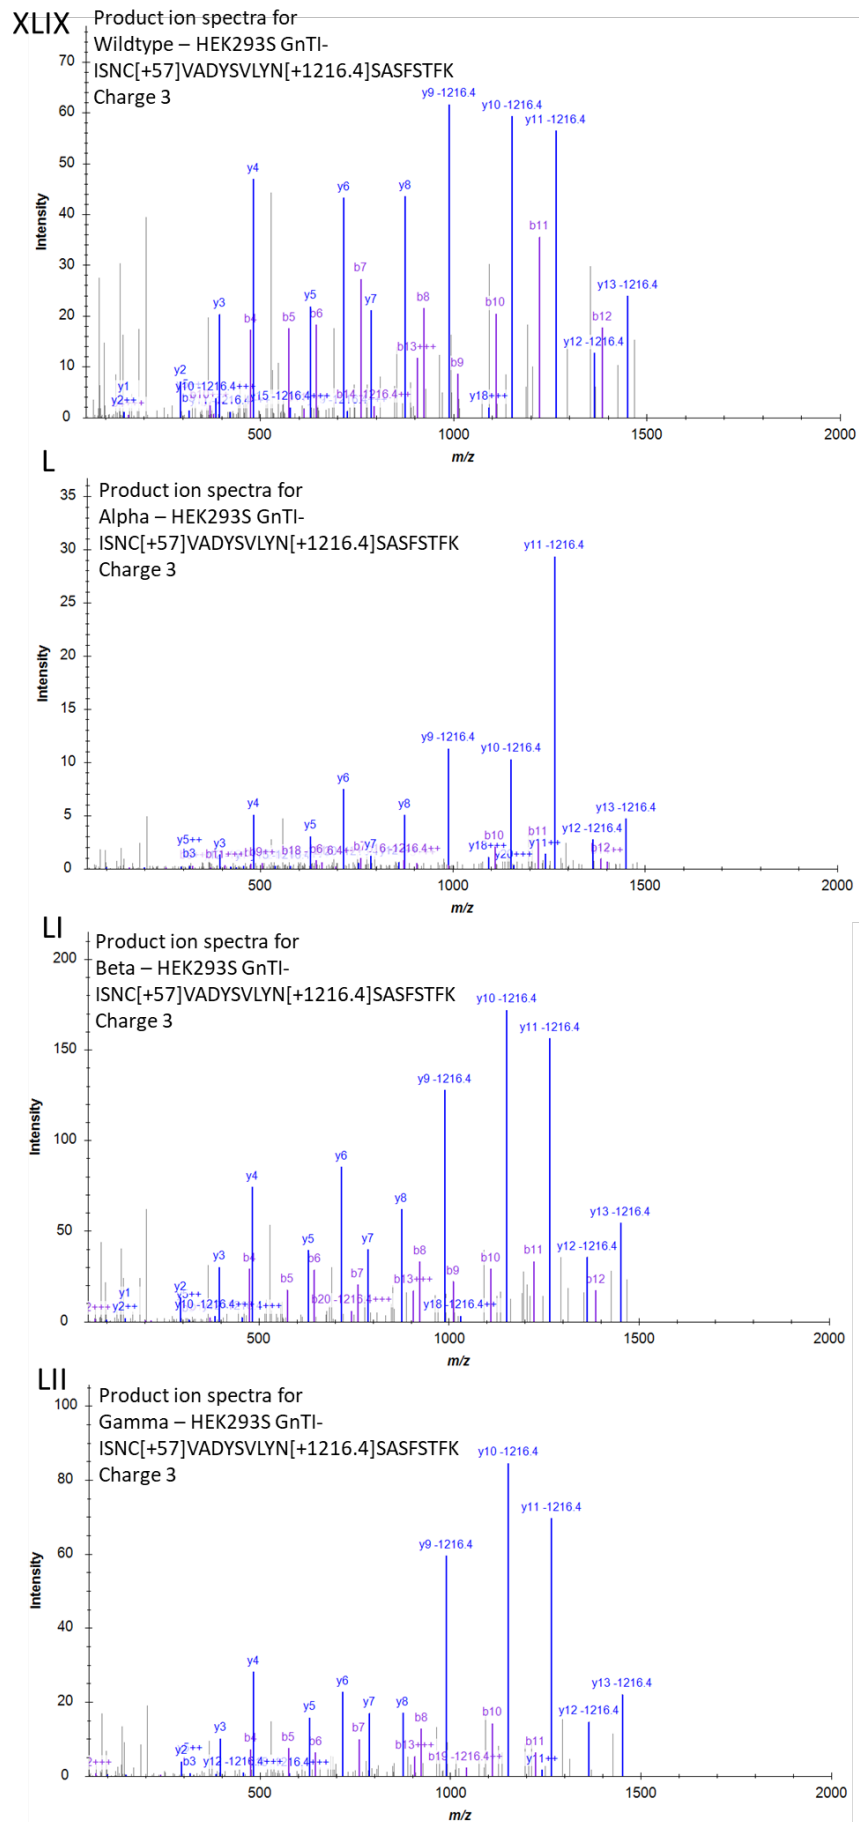

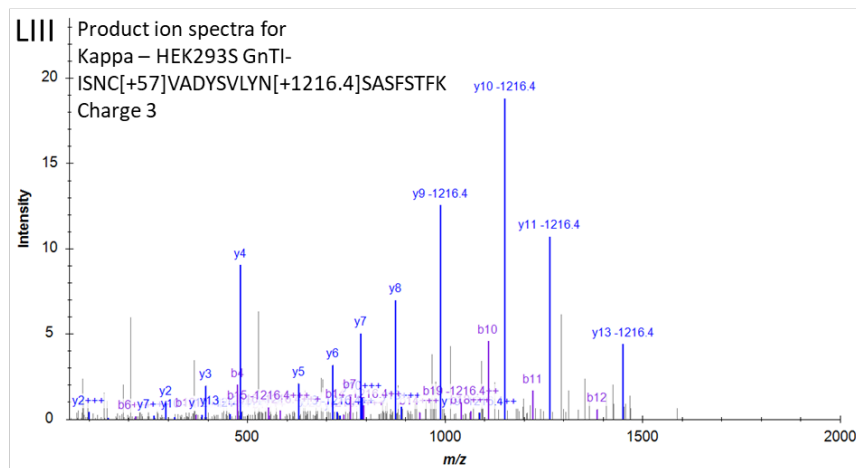

**Figure S2.** Product ion spectra acquired for tryptic digests of Endo F1-treated wildtype and VOC-RBDs annotated as glycosylated at asparagine residues of peptides FPNITNLCPFGEVFNATR (panels I to XXXIII) and ISNCVADYSVLYNSASFSTFK (XXXIV to LIII). The mass spectra shown in panels I, III, VIII, IX, XI, XIII, XVIII, XXIII, XXVIII, XXXV, XLIV, and XLIX were obtained from the tryptic digests of Endo F1-treated wildtype RBD expressed in HEK293S GnTI- cells. The mass spectrum shown in panel XXXIV was obtained from the tryptic digest of Endo F1-treated RBD expressed in HEK293T cells. The mass spectra shown in panels XXXIII and XLI were obtained from the tryptic digests of RBD expressed in *E. coli*. The mass spectra shown in panels IV, XIV, XIX, XXIV, XXIX, XXXVI, XLII, XLIII, XLV, and L were obtained from the tryptic digests of Endo F1-treated alpha RBD expressed in HEK293S GnTI- cells. The mass spectra shown in panels V, XV, XX, XXV, XXX, XXXVII, XLVI, and LI were obtained from the tryptic digests of Endo F1-treated beta RBD expressed in HEK293S GnTI- cells. The mass spectra shown in panels II, VI, X, XII, XVI, XXI, XXVI, XXXI, XXXVIII, XLVII, and LII were obtained from the tryptic digests of Endo F1-treated gamma RBD expressed in HEK293S GnTI- cells. The mass spectra shown in panels VII, XVII, XXII, XXVII, XXXII, XXXIX, XLVIII, and LIII were obtained from the tryptic digests of Endo F1-treated kappa RBD expressed in HEK293S GnTI- cells. The mass spectrum shown in panel XL was obtained from the tryptic digest of Endo F1-treated BA.1 RBD expressed in HEK293T cells. Annotated y- and b-ions are colored in blue and purple, respectively, and the precursor ions are colored in light blue.

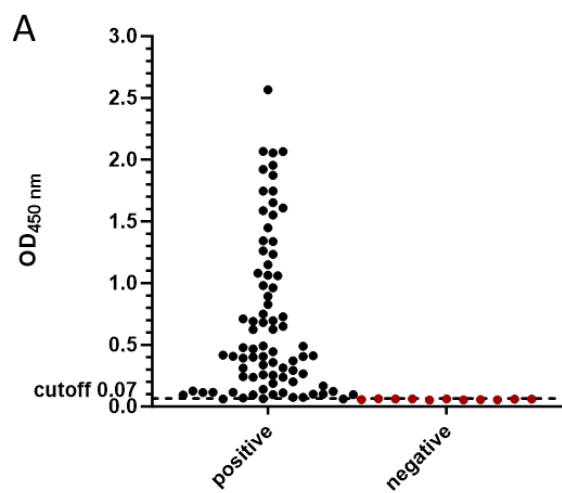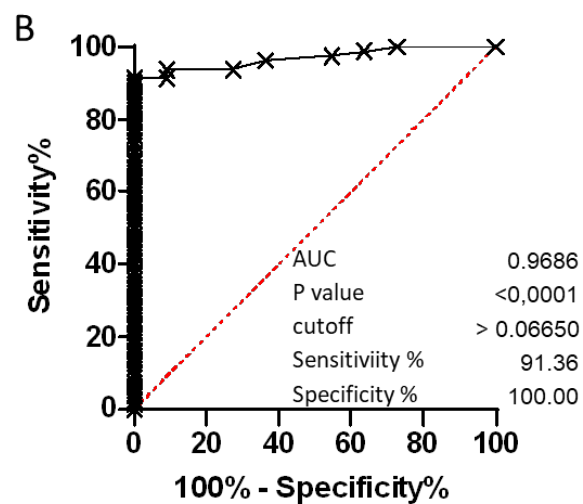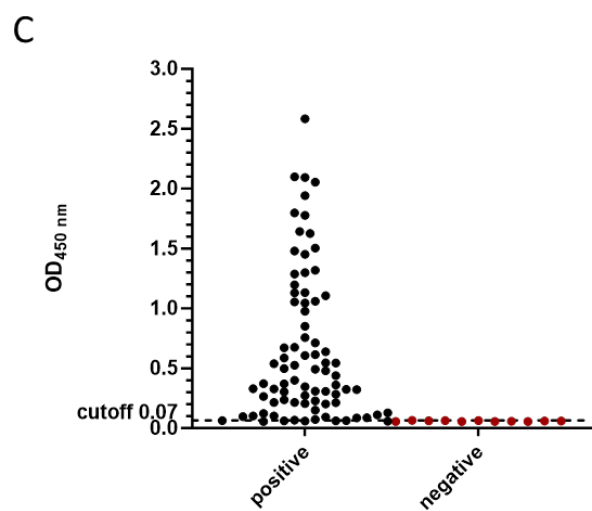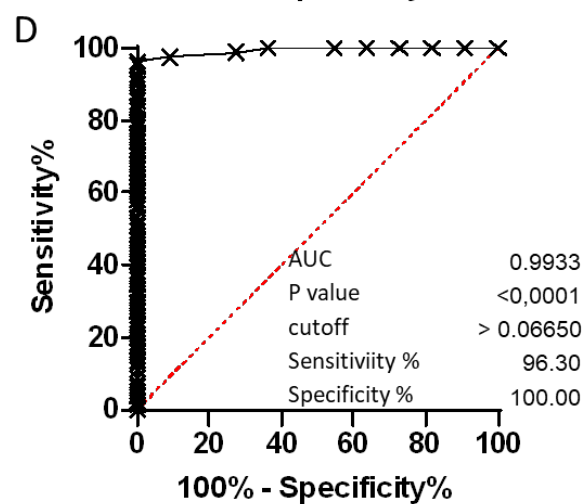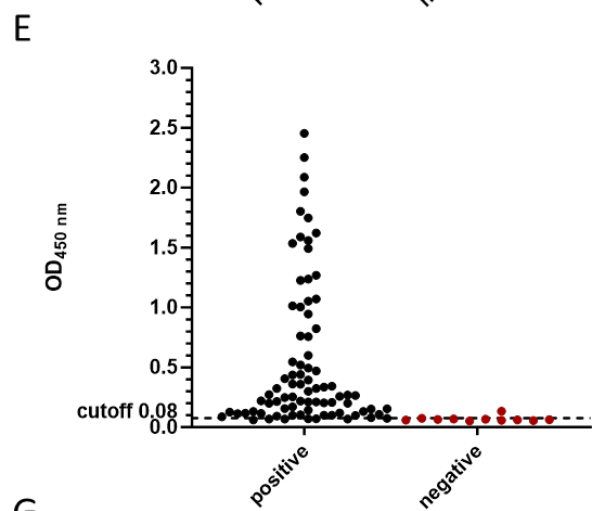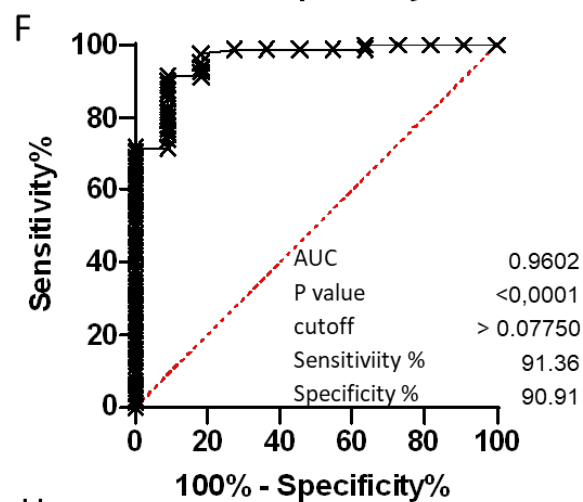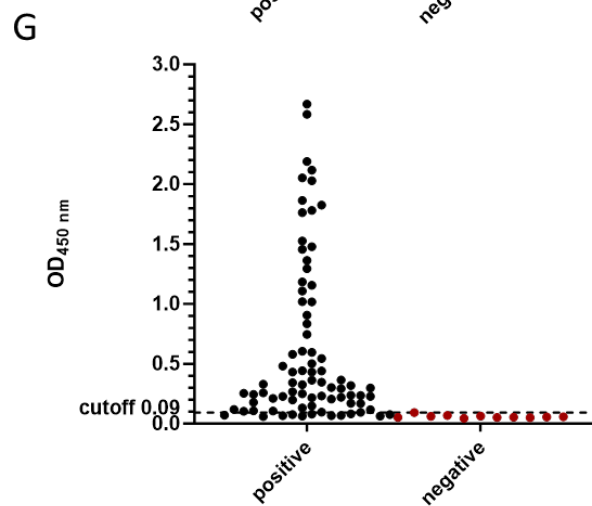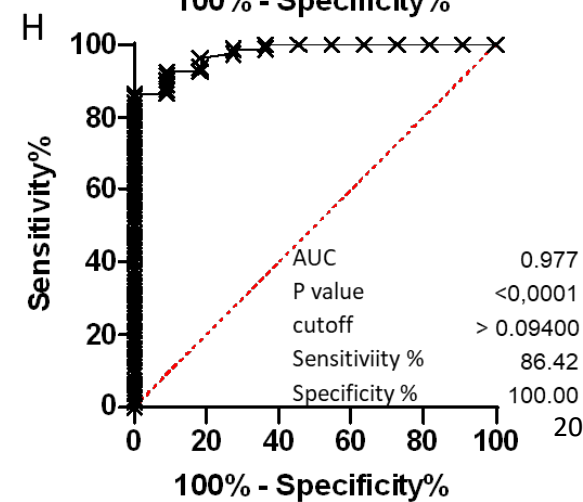

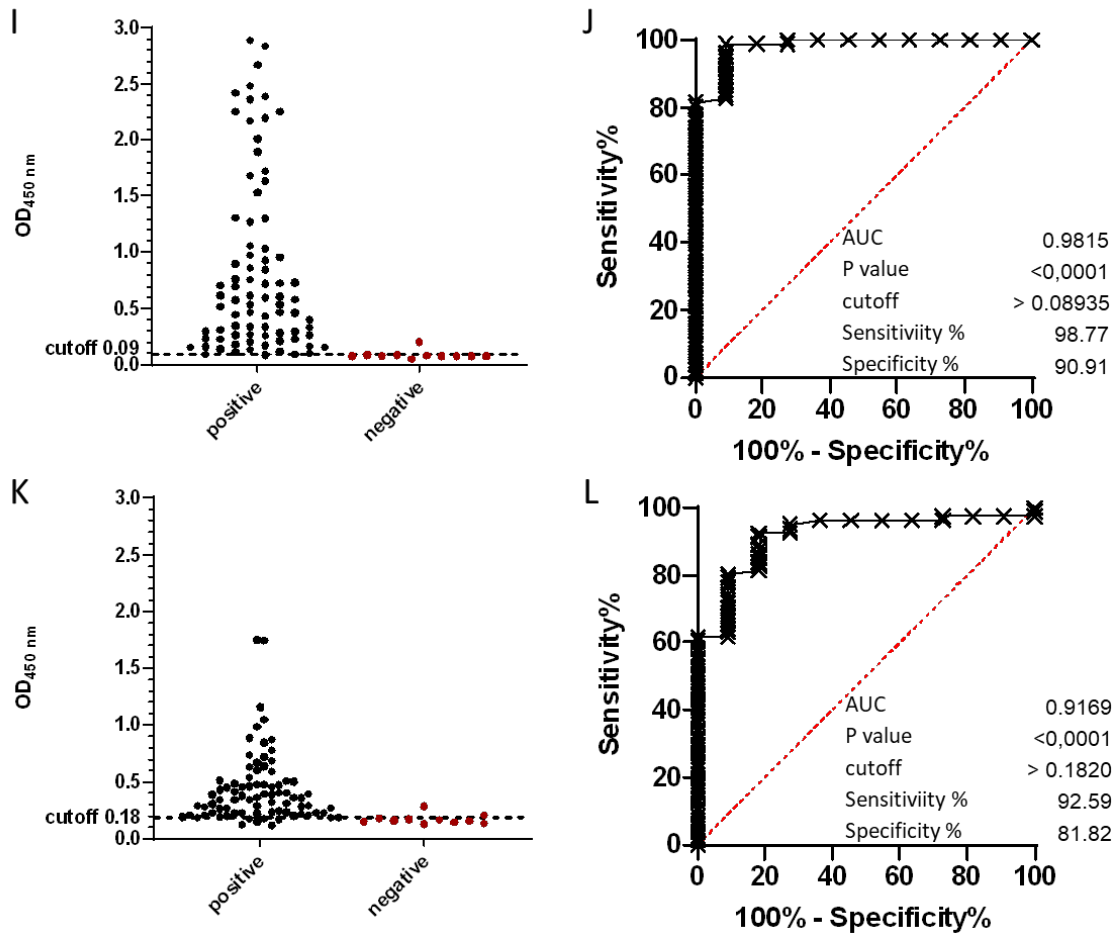

**Figure S3.** OD<sub>450</sub> values (left) and calculated ROC curves (right) of the IgG ELISA using different VOC RBDs in a sample set of 81 SARS-CoV-2 positive (black) and 10 negative control samples (red) including also positive and negative pools, created with GraphPad Prism 10.0.3. The cutoff was determined using the Youden index. A, B: wt-RBD; C, D: alpha-RBD; E, F: beta-RBD; G, H: gamma-RBD; I, J: kappa-RBD; K, L: BA.1-RBD.

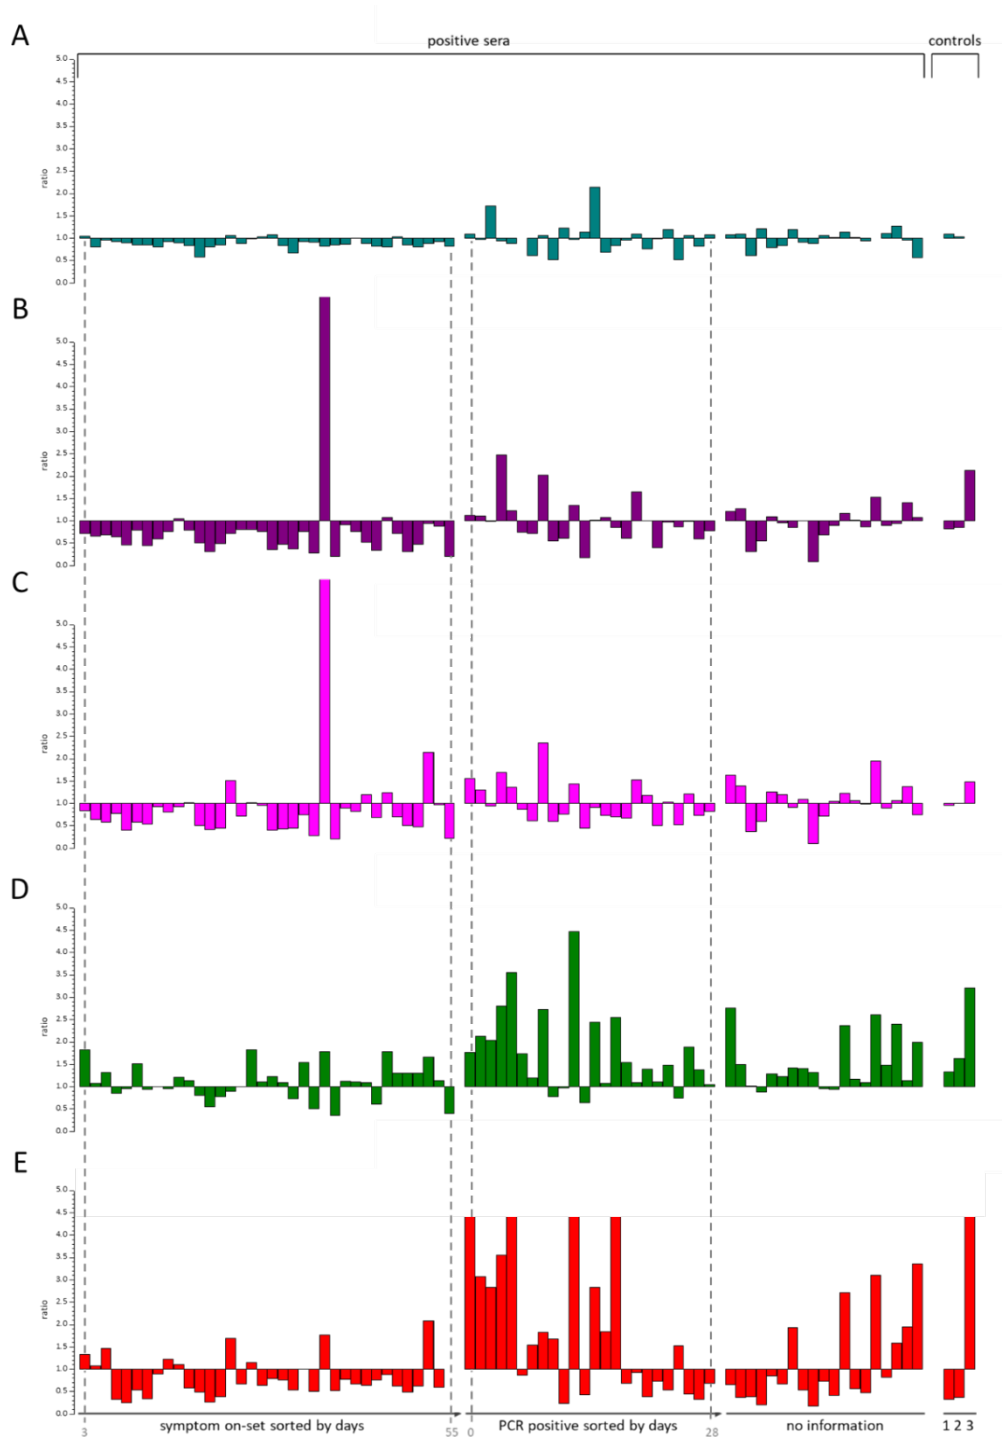

**Figure S4.** Normalized OD<sub>450</sub> values obtained for all serum samples using the IgG ELISA coated with different VOC RBDs. OD<sub>450</sub> values were normalized to the wildtype HEK293S RBD: OD<sub>450</sub>[X-RBD]/OD<sub>450</sub>[wt-RBD]; A: Alpha (cyan), B: Beta (purple), C: Gamma (magenta), D: Kappa (green) and E: BA.1 (red). Ratios greater than 1 and less than 1 indicate better and weaker binding, respectively, compared to wt-RBD. Serum samples are divided into four segments. Segment 1: Samples with symptom onset information sorted by ascending days. Segment 2: PCR positive samples in ascending day order. Segment 3: Positive samples with no further information. Segment 4: Control samples prepared by pooling positive (1, 2), and negative serum samples (3). The values were used to calculate the mean values shown in Figure 3.

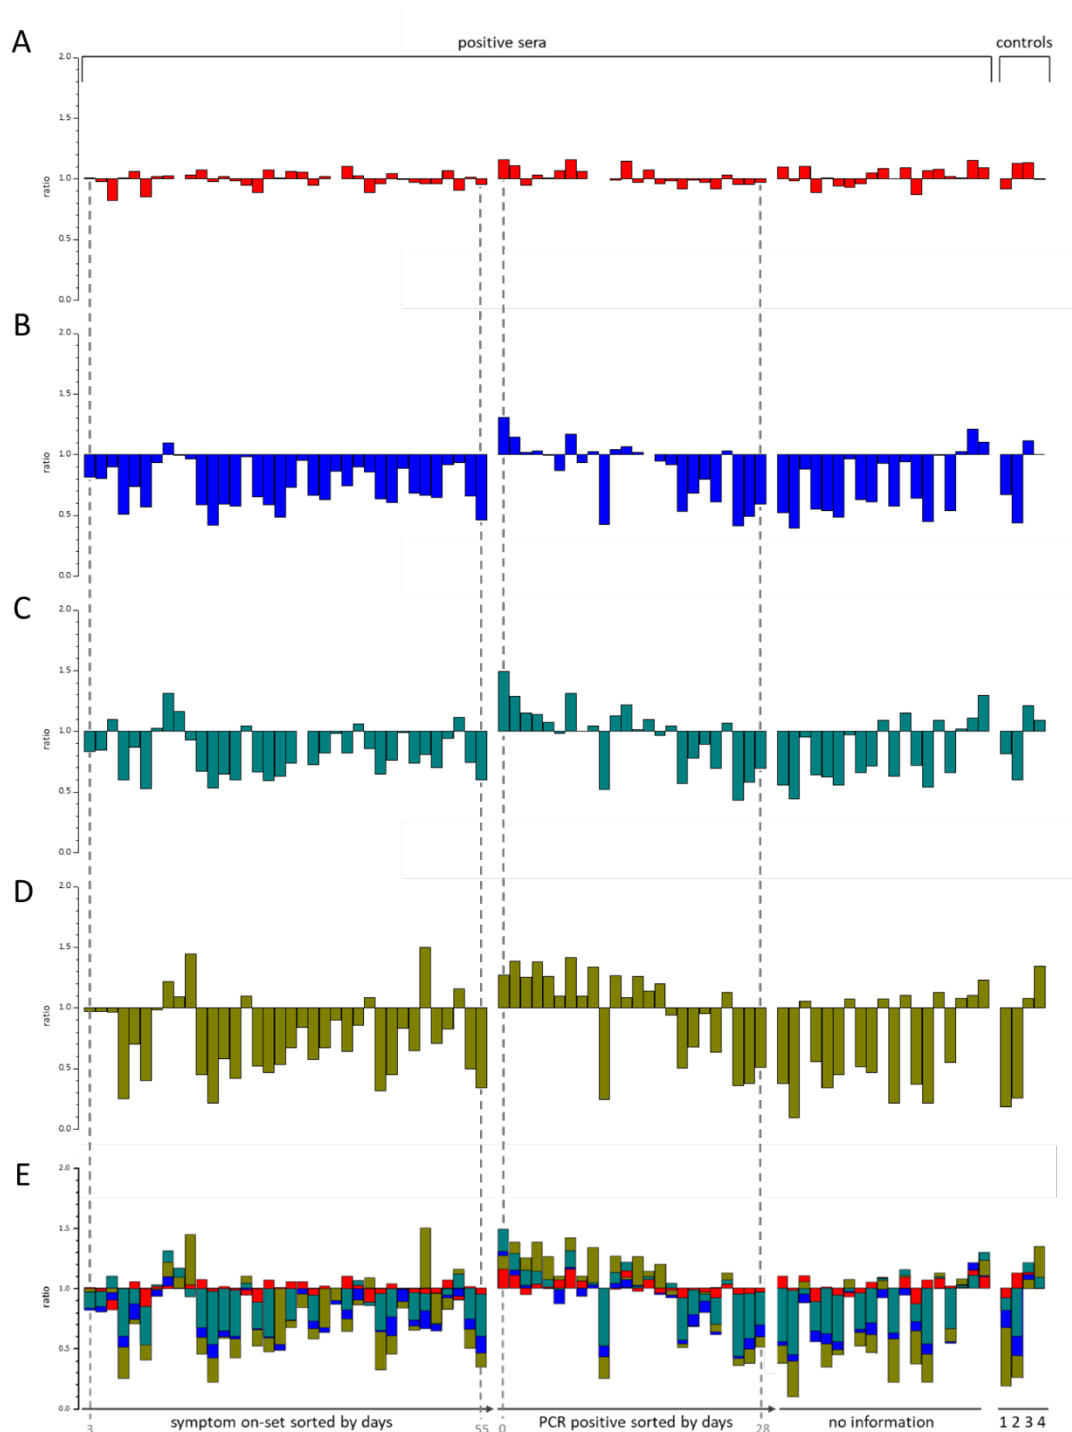

**Figure S5.** Normalized OD<sub>450</sub> values obtained for all serum samples using the IgG ELISA coated with different glycosylated RBDs. OD<sub>450</sub> values were normalized to the wild-type HEK293S RBD: OD<sub>450</sub>[X-RBD]/OD<sub>450</sub>[S-RBD]; A: T-RBD (red), B: F1-RBD (blue), C: PNG-RBD (cyan), D: *E. coli* RBD (green), E: RBDs from panels A to D combined. Ratios greater than 1 and less than 1 indicate better and weaker binding, respectively, compared to S-RBD. Serum samples are divided into four segments. Segment 1: Samples with symptom onset information sorted by ascending days. Segment 2: PCR positive samples in ascending day order. Segment 3: Positive samples with no further information. Segment 4: Control samples prepared by pooling high positive (1), positive (2), and negative serum samples (3 for pool I, 4 for pool II). The values were used to calculate the mean values shown in Figure 4.

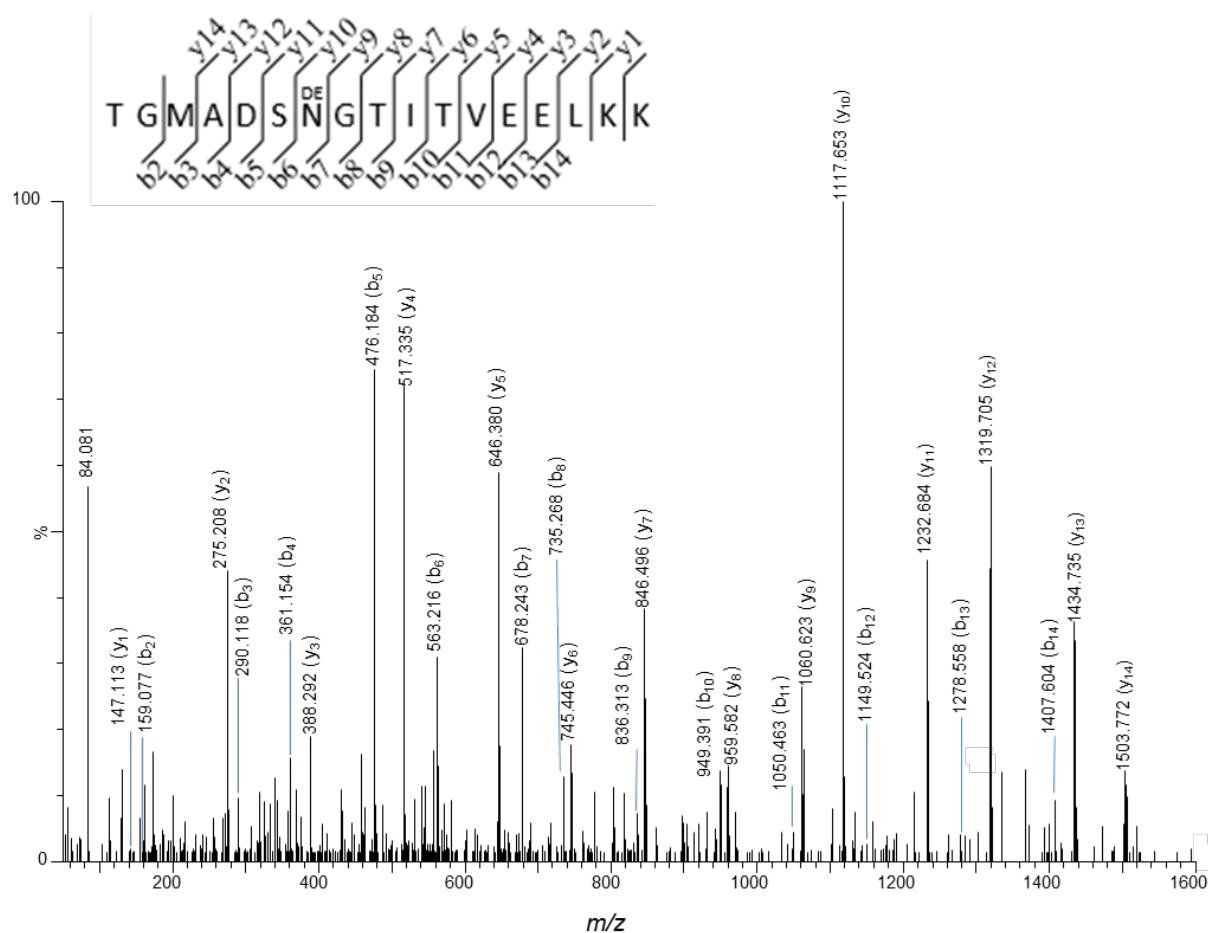

**Figure S6.** Product ion spectrum acquired for a peptide detected in the tryptic digest of the membrane protein as a doubly protonated ion at  $m/z$  897.949. The M-protein was expressed in HEK293S GnTI- cells, digested with trypsin, and enriched with concanavallin A before incubation with Endo F1 and PNGase F. The annotated b- and y-ions suggested the sequence TGMADSN[+1]GTITVEELKK, with the mass shift of +1 at asparagine indicating an aspartic acid residue due to PNGase F treatment.



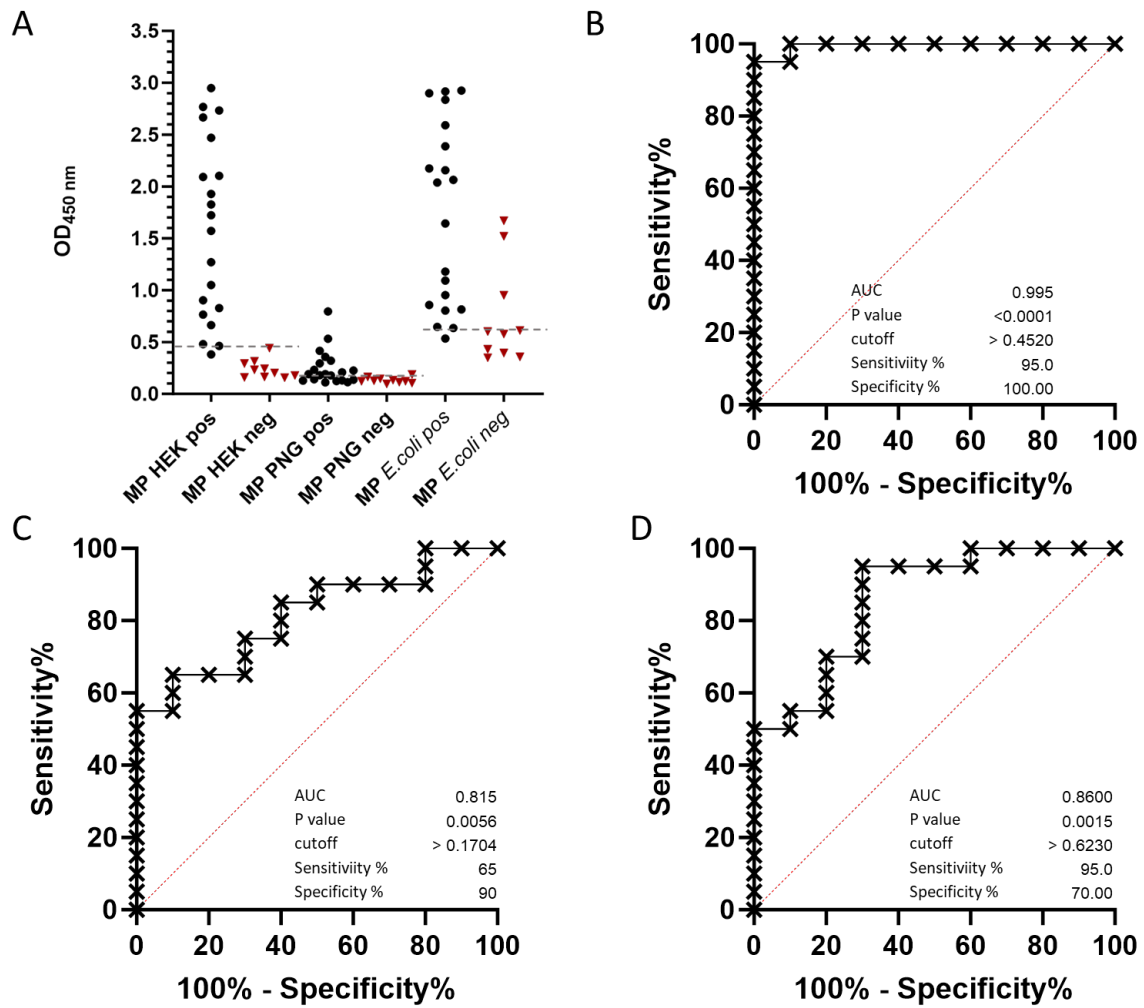

**Figure S7.** OD<sub>450</sub> values of twenty positive sera (black) and ten negative sera (dark red) used in the IgG ELISA of the M-protein (MP) present in HEK293S lysates without (HEK) and after deglycosylation with PNGase F (PNG) and an *E. coli* lysate (A). The cutoffs are marked with a gray dashed line for the HEK M-proteins. Calculated ROC-curves (GraphPad Prism 10.0.3) of glycosylated HEK (B), deglycosylated PNG (C), and *E. coli* (D) M-proteins used in an IgG ELISA. The cutoff was determined using the Youden index.
